# 1 **A systematic pipeline for classifying bacterial operons reveals the evolutionary landscape of** 2 **biofilm machineries**

3  
4 Cedoljub Bundalovic-Torma <sup>1,2,\$</sup>, Gregory B. Whitfield <sup>1,2</sup>, Lindsey S. Marmont <sup>1,2,#</sup>, P. Lynne Howell  
5 <sup>1,2</sup> and John Parkinson <sup>1,2,3\*</sup>

6  
7 Affiliations:

8 <sup>1</sup> Program in Molecular Medicine, The Hospital for Sick Children, Toronto, ON, Canada

9 <sup>2</sup> Department of Biochemistry, University of Toronto, Toronto, ON, Canada

10 <sup>3</sup> Department of Molecular Genetics, University of Toronto, Toronto, ON, Canada

11 Current Addresses: <sup>\$</sup>Department of Cell Systems Biology, University of Toronto, Toronto, ON, Canada

12 and <sup>#</sup>Department of Microbiology, Harvard Medical School, Boston, MA, USA.

13  
14 \* To whom correspondence should be addressed: [john.parkinson@utoronto.ca](mailto:john.parkinson@utoronto.ca)

15 Short Title: Classification of Bacterial Biofilm Machineries

16  
17 Keywords: Biofilms; Exopolysaccharides; Comparative Genomics; Phylogenetic Classification

## 18 19 **ABSTRACT**

20 In bacterial functionally related genes comprising metabolic pathways and protein complexes are  
21 frequently encoded in operons and are widely conserved across phylogenetically diverse species. The  
22 evolution of these operon-encoded processes is affected by diverse mechanisms such gene duplication,  
23 loss, rearrangement, and horizontal transfer. These mechanisms can result in functional diversification  
24 of gene-families, increasing the potential evolution of novel biological pathways, and serves to adapt

25 pre-existing pathways to the requirements of particular environments. Despite the fundamental  
26 importance that these mechanisms play in bacterial environmental adaptation, a systematic approach  
27 for studying the evolution of operon organization is lacking. Herein, we present a novel method to  
28 study the evolution of operons based on phylogenetic clustering of operon-encoded protein families  
29 and genomic-proximity network visualizations of operon architectures. We applied this approach to  
30 study the evolution of the synthase dependent exopolysaccharide (EPS) biosynthetic systems: cellulose,  
31 acetylated-cellulose, poly- $\beta$ -1,6-*N*-acetyl-D-glucosamine (PNAG), Pel, and alginate. These polymers  
32 have important roles in biofilm formation, antibiotic tolerance, and as virulence factors in opportunistic  
33 pathogens. Our approach reveals the complex evolutionary landscape of EPS machineries, and enabled  
34 operons to be classified into evolutionarily distinct lineages. Cellulose operons show phyla-specific  
35 operon lineages resulting from gene loss, rearrangement, and the acquisition of accessory loci, and the  
36 occurrence of whole-operon duplications arising through horizontal gene transfer. Our evolutionary-  
37 based classification also distinguishes between the evolution of PNAG production between Gram-  
38 negative and Gram-positive bacteria on the basis of structural and functional evolution of the  
39 acetylation modification domains shared by PgaB and IcaB loci, respectively. We also predict several  
40 *pel*-like operon lineages in Gram-positive bacteria, and demonstrate in our companion paper  
41 (BIORXIV/2019/768473) that *Bacillus cereus* produces a Pel-dependent biofilm that is regulated by  
42 cyclic-3',5'-dimeric guanosine monophosphate (c-di-GMP).

43

#### 44 **AUTHOR SUMMARY**

45 In bacterial genomes biological processes are frequently encoded as operons of co-transcribed  
46 neighbouring genes belonging to diverse protein families. Therefore, studying the evolution of bacterial  
47 operons provides valuable insight into understanding the biological roles of genes involved in  
48 environmental adaptation. However, no systematic approach has yet been devised to examine both the

49 evolutionary relationships of operon encoded genes and the evolution of operon organization as a  
50 whole. To address this challenge, we present a novel method to study operon evolution by integrating  
51 phylogenetic tree based clustering and genomic-context networks. We apply this approach to perform  
52 the first systematic survey of all known synthase dependent bacterial biofilm machineries,  
53 demonstrating the generalizability of our approach for operons of diverse size, protein family  
54 composition, and species distribution. Our approach is able to identify distinct biofilm operon clades  
55 across phylogenetically diverse bacteria, resulting from gene rearrangement, duplication, loss, fusion,  
56 and horizontal gene transfer. We also elucidate different evolutionary trajectories of Gram-negative and  
57 Gram-positive biofilm production machineries, and in a companion paper (BIORXIV/2019/768473)  
58 present the experimental validation of a novel mode of biofilm production in a subset of Gram-positive  
59 bacteria.

60

## 61 **INTRODUCTION**

62 The generation of novel genomes through next generation sequencing is creating a wealth of  
63 opportunities for understanding the evolution of biological systems. A key challenge is the development  
64 of robust and systematic approaches that allow genes not only to be classified into functional  
65 categories, but also infer evolutionary relationships. In bacterial genomes, functionally-related genes  
66 corresponding to metabolic pathways or protein complexes are often encoded by neighbouring co-  
67 transcribed loci, termed an operon. Computational prediction of operons based on the conservation of  
68 short inter-genetic distances has frequently been used to assign functions to uncharacterized genes from  
69 the known biological roles of their co-conserved neighbours(1–3). Analyzing patterns of sequence  
70 divergence within each gene can subsequently yield insights into species-specific functionalities.  
71 However, genes in an operon do not function isolation but tend to form parts of higher-order, biological  
72 modules (e.g. protein complexes or metabolic pathways). Consequently, analysing evolutionary events

73 in an operonic context provides additional opportunities to better infer functional relationships. For  
74 example, while sequence divergence has the potential to impact the function of a single gene,  
75 evolutionary events that alter operon structure (e.g. rearrangements, duplications, gains and losses)  
76 have the potential to dramatically alter the overall function of the operon(4,5).  
77  
78 Due to the lack of a systematic framework, very few studies have attempted to examine the role of  
79 evolutionary events on operon structure(6,7). Phylogenetic-tree based classification of 197 ATP binding  
80 motif sequences associated with operon-encoded bacterial ATP-binding cassette (ABC) transporters  
81 was successful in resolving two evolutionarily distinct transporter clades associated with import and  
82 export functions(8). Gene duplications have been shown to play an important role in driving protein  
83 superfamily expansion among bacterial genomes and its frequency is significantly correlated with  
84 genome size(9). The study of co-localized “gene blocks” across bacteria has also shown that gene  
85 duplication, loss, and rearrangement play important roles in shaping the large-scale organization of  
86 bacterial genomes(7). Key to these analyses is the use of a rigorous and systematic approach for  
87 assigning genes into evolutionarily related ‘families’ that are likely to share similar functions. However,  
88 the inference of biological function based on sequence similarities of genes or proteins are often  
89 complicated by functional divergence arising through recent gene duplication events. A variety of  
90 metrics have been employed for determining the relatedness of genes and their protein products from  
91 which groups (i.e. clustering) can be defined. These metrics include: evolutionary distances derived  
92 through the construction of phylogenetic trees(10–13); global protein sequence similarities(14–16); and  
93 shared sequence features such as conserved amino acids at specific sites or shared amino acid  
94 subsequences(17,18). The aim of these approaches is to automatically resolve large protein families  
95 comprising potentially thousands of genes into a smaller number of clusters defining evolutionarily  
96 related subfamilies with similar biological roles. Here we build on these methods and present a novel

97 framework for the systematic classification and analysis of genes in the context of operons. Focusing  
98 on synthase-dependent exopolysaccharide (EPS) biosynthetic machineries, we use our framework to  
99 explore how gene divergence in combination with duplication, loss, and rearrangement events have  
100 shaped the evolution of EPS operons, and may have influenced the biofilm producing capabilities of  
101 evolutionarily diverse bacteria.

102

103 EPS are an important constituent of bacterial biofilms that not only ensure survival in response to  
104 limited nutrient availability, but are also involved in antibiotic tolerance, immune evasion and serve as  
105 virulence factors in many clinically relevant pathogens (19–21). Distinct mechanisms have been  
106 identified in the production of bacterial EPS, including the well-characterized Wzx/Wzy and ABC  
107 transporter-dependent pathways involved in capsular polysaccharide and lipopolysaccharide secretion  
108 in Gram-negatives (22), and the more recently identified synthase-dependent systems(23).

109

110 Typically, synthase-dependent EPS systems are organized as discrete operons comprised of genes  
111 encoding: 1) an inner membrane associated polysaccharide synthase and copolymerase subunit; 2) a  
112 regulatory domain responsible for binding the intracellular signaling molecule cyclic-3',5'-dimeric  
113 guanosine monophosphate (c-di-GMP); 3) periplasmic polysaccharide modification enzymes; and 4) a  
114 periplasmic tetratricopeptide repeat (TPR) domain coupled with an outer membrane pore(23). This  
115 operonic organization allows bacteria to acquire complete EPS functionality through discrete lateral  
116 gene transfer events and may act as a key driver in niche adaptation(24). To date five synthase-  
117 dependent EPS have been identified: cellulose, acetylated-cellulose, poly- $\beta$ -1,6-*N*-acetyl-D-  
118 glucosamine (PNAG), alginate and the Pel polysaccharide. While much interest has focused on the  
119 molecular basis of biofilm formation, much less is known about how these systems have propagated  
120 across bacterial taxa. Further, it is not known how EPS operons evolve to help bacteria adapt to diverse

121 environments and, from a human health perspective, establish infection and cause disease. While a  
122 previous survey of cellulose EPS machineries has been reported(25), a comprehensive systematic  
123 analysis of all EPS machineries is lacking.

124

125 In this study, we describe a phylogenetic tree-based clustering method for defining protein sequence  
126 subfamilies and apply it to study the evolutionary relationships of operons. This approach was  
127 employed for the systematic classification of EPS operons predicted from a survey of over a thousand  
128 bacterial genomes. Applying a graphical visualization approach, we demonstrate that phylogenetic  
129 clustering enables the resolution of discrete EPS operon clades, enabling the identification of distinct  
130 operon organizations across diverse bacterial phyla which have been shaped by locus duplications,  
131 losses, and rearrangement events. For example, we demonstrate the biological implications of operon  
132 evolution that has been shaped by horizontal gene transfer (HGT) and subsequent divergence, for two  
133 cellulose operon clades among Proteobacteria which correspond to the production of cellulose  
134 polymers with different structural organizations. Although Pel production was initially identified and  
135 characterized in *Pseudomonas aeruginosa*(26), our approach also identified a number of *pel*-like  
136 operons in some *Bacillus* spp. and other Gram-positives. A subset of these systems appear to be  
137 regulated by the intracellular signalling molecule c-di-GMP. In our companion paper  
138 (BIORXIV/2019/768473) we experimentally validate these finding and demonstrate the production of  
139 Pel by the Gram-positive *Bacillus cereus* ATCC 10987 that is regulated by c-di-GMP.

140

## 141 **RESULTS**

### 142 **A Systematic Survey of Bacterial EPS Operons Reveals EPS Systems Across Bacteria of Diverse** 143 **Lifestyles and Environmental Niches**

144 To examine the phylogenetic distribution of EPS systems, we first performed a systematic survey of all  
145 five previously characterized synthase-dependent EPS systems (cellulose, acetylated-cellulose, PNAG,  
146 Pel, and alginate) (**Supplemental Tables 1 & 2**) through an iterative hidden Markov-model (HMM) -  
147 based search strategy and subsequent genomic-proximity based reconstruction of 1861 complete  
148 reference and representative bacterial genomes (downloaded April 20, 2015 - see **Methods**). We  
149 identified 407 cellulose, 321 PNAG, 146 Pel, 64 alginate, and 4 acetylated-cellulose EPS “operons”  
150 defined as comprising at least: 1) a polysaccharide synthase subunit; and 2) one additional locus  
151 involved in EPS modification or transport as defined previously(19) (**Supplemental Table 3**). These  
152 could be allocated to 367, 288, 140, 60 and 4 different bacterial species, respectively (**Figure 1**). Each  
153 type of system was largely associated with proteobacteria, with cellulose, PNAG and Pel additionally  
154 featuring operons from Bacilli and Clostridia, which to our knowledge have not been previously  
155 reported. *pel* operons exhibited the greatest diversity of bacterial families (shannon index of bacterial  
156 families – 2.74) with representation from Thermotogales, Actinobacteridae and Rubrobacteridae,  
157 among others. PNAG was significantly enriched in pathogen genomes (161/289 - 56%; T-test p-value  
158 <0.005). Conversely, Pel (84/140 - 60%; T-test p-value < 0.001), alginate (39/60 - 65%; T-test p-value  
159 < 0.001) and cellulose (187/367 - 51%; T-test p-value < 0.001) were significantly enriched in non-  
160 pathogen genomes (**Figure 1 and Supplemental Figure 1**). Interestingly, both cellulose and PNAG  
161 operons were significantly associated with genomes with host-associated lifestyles (T-test p-values <  
162 0.001). While most genomes contain only a single synthase-dependent EPS system, we observed many  
163 instances of co-occurrence, with cellulose and PNAG systems being the most common combination (83  
164 genomes), followed by alginate and *pel* (20 genomes). Notably, all species possessing three systems  
165 were *Pseudomonas* spp., e.g.: *Pseudomonas protegens* strains Pf-5 and CHA0 (alginate, *pel* and  
166 PNAG); *Pseudomonas fluorescens* SBW25 and *Pseudomonas* sp. TKP (acetylated-cellulose, alginate,  
167 and PNAG).

168

## 169 **Evolution of EPS Operons is Driven by Gene Duplication, Loss and Rearrangements**

170 The processes underlying EPS operon evolution across diverse bacterial phyla is poorly understood..

171 We examined how operon organization is influenced by the following evolutionary events that are

172 likely to affect EPS production capabilities among bacteria: 1) single locus or whole operon

173 duplications, corresponding to dosage effects altering the level of EPS modification or export; 2) locus

174 losses, that may indicate a reduction or loss in EPS production or modification, or may suggest

175 supplementation of the lost function with a novel gene; 3) operon rearrangements which may affect the

176 regulation of EPS production through the order of expression of individual EPS system components;

177 and, 4) gene-fusions, resulting in enhanced co-expression of interacting subunits.

178

179 For each set of predicted EPS operons, the resulting number of operon evolutionary events were

180 assessed relative to the locus composition and ordering of reference Gram-negative experimentally

181 characterized operons defined from previously published studies(19,28–32) . With the exception of

182 acetylated-cellulose, locus losses were found to be the most frequent event (~46% of predicted operons

183 lacked one or more reference loci), and occurred with the greatest frequency for Pel which exhibited an

184 average loss of 2.6 loci lost per operon (**Supplemental Table 4**). Among all EPS systems the majority

185 of locus losses were associated with the outer-membrane pore encoding loci (441 / 993 - 44% of all

186 locus loss events identified) among Gram-positive species (**Supplemental Table 4**), consistent with the

187 lack of an outer-membrane bilayer in Gram-positive membrane architectures. Operon rearrangements

188 were the next most frequent evolutionary events (~ 39%), largely associated with cellulose operons(25)

189 (327 / 407 – 80%). Focusing on duplication events, within-operon loci duplications tended to be more

190 common than whole-operon duplications (2 or more core EPS loci identified  $\geq$  1 Kbp apart), with the

191 exception of cellulose operons (29 whole operon duplications v 24 loci duplications). All duplicated



192 operons were found to be separated by at least 10 kbp, suggesting they may have been acquired through  
193 HGT rather than tandem duplication of a pre-existing operon(32,33).

194

## 195 **Systematic Phylogenetic Distance-Based Clustering of EPS Operon Loci and Genomic-Proximity** 196 **Networks Identifies Evolutionarily Distinct Operon Clades**

197 To better understand how these evolutionary events may have altered operon function, we next devised  
198 an agnostic, systematic classification strategy to cluster each family of EPS operon loci on the basis of  
199 phylogenetic distance (**Figure 2A; see Methods**). In brief, for each EPS operon locus, multiple  
200 sequence alignments were generated and used to construct phylogenetic trees. From these trees, we  
201 defined sets of clusters through an iterative scan of the tree structure that captures an increasing  
202 sequence distance between family members, starting at the leaves and ending at the root. During this  
203 scan, sequences are grouped into a cluster if they share a common node (i.e. are within a specified  
204 evolutionary distance). To define the optimal set of clusters for each locus, we then applied three  
205 cluster quality scoring schemes (Q1, Q2 and Q3) based on the following metrics: proportion of  
206 sequences clustered (to maximize the number of sequences clustered); average silhouette score (to  
207 minimize the occurrence of clusters containing highly divergent sequences); and the Dunn index (to  
208 maximize the separation of closely related sequences from divergent sequences). For each scoring  
209 scheme, we defined the optimal pattern of clustering based on the evolutionary distance (expected  
210 number of substitutions per site) derived from a maximum-likelihood constructed phylogenetic tree  
211 (**see Methods for more details**) that maximizes the quality score. Comparisons across scoring schemes  
212 (see below) for cellulose operon loci identified Q2 as providing the most informative sets of clusters.  
213 Applying this scoring scheme to all EPS loci revealed the average number of sequence clusters  
214 generated correlated with the total number of operons predicted for each type of EPS system (**Figure**  
215 **2B**), which further corresponded to the underlying differences in species distributions of EPS systems

216 **(Figure 1C)**. For example, the cellulose system was predicted to have the largest average number of  
217 sequence clusters overall (30 clusters) and also had the greatest species diversity (shannon index 2.16 –  
218 **Supplemental Figure 2**) compared to all other systems. Furthermore, for each EPS system the  
219 variability of the number of sequence clusters predicted per locus (**Figure 2C**) suggests differing  
220 degrees of locus evolution that are likely to be the result of different structural and functional  
221 constraints. For example, a higher degree of conservation would be expected for glycosyl transferase  
222 (GT) subunits to maintain efficient co-ordination between polymerization and inner-membrane  
223 transport of EPS, while increased variability of periplasmic modification enzymes suggests that only a  
224 subset of highly conserved motifs are required to carry out polysaccharide modification reactions.  
225  
226 To compare patterns of clusters identified by each scoring scheme, we applied the three scoring  
227 schemes to each set of genomically-neighbouring protein sequences assigned by HMM searches to a  
228 given cellulose locus (*bcsA*, *bcsB*, *bcsZ*, and *bcsC*). From the resulting clusters we generated operon  
229 genomic-proximity networks (**Figure 2D**). These networks provide a visual display of the conservation  
230 of individual loci, together with their respective genomic proximity to yield patterns of sequence  
231 divergence associated with the emergence of distinct forms of operon organization. In the absence of  
232 any clustering (Q0), the network trivially resolves into individual operons featuring up to four loci.  
233 Applying the Q1 scoring scheme to each locus, the network reveals a variable number of clusters  
234 across operon loci, with each cluster generally comprising sequences belonging to the same bacterial  
235 genus. Application of the Q2 scoring scheme results in the generation of clusters of increased size,  
236 encompassing species featuring distinct operon organizations and compositions. For example, two  
237 distinct lineages of alpha-proteobacterial cellulose operons can be easily distinguished, one of which is  
238 more closely related in sequence and composition to gamma-proteobacterial operons, and a second  
239 which lacks two loci and appears evolutionarily divergent from gamma-proteobacterial operons(25).

240 However, these distinctions were more difficult to resolve using the Q3 scoring scheme due to  
241 clustering of highly divergent sequences. Given the trade-off between clustering highly divergent  
242 sequences (Q3) with the depiction of individual operons (Q1), we applied the Q2 scoring scheme to  
243 generate clusters for all EPS loci (**Supplemental Table 5**).

244

245 Using this locus-specific phylogenetic clustering approach, we were able to devise a classification  
246 scheme to define EPS locus clades based on the average evolutionary distance of a group of clustered  
247 locus sequences to a reference operon sequence (**Supplemental Table 3**). For example, the cellulose  
248 polysaccharide synthase locus, *bcsA*, from *Escherichia coli* is assigned to clade 1, while divergent  
249 alpha-proteobacterial species including *Rhodobacter sphaeroides* are assigned to clade 2. We further  
250 resolved operons into distinct groups based on the genomic co-occurrence patterns of locus clades; e.g.  
251 for the cellulose operon (*bcsABZC*) we identify clade combinations of 1:1:1:1, 1:2:2:2 and 1:3:5:3,  
252 which correspond to operons identified in *Escherichia* spp. and other closely related enterobacteria,  
253 *Klebsiella* spp., and *Burkholderia* spp., respectively.

254

### 255 **Phylogenetic Clustering and Genomic Proximity Networks Reveal Evolutionary Events Driving** 256 **EPS Operon Divergence**

257 Focusing on cellulose EPS operons, relative to BcsA, the polysaccharide synthase subunit, the three  
258 other subunits (BcsB, BcsZ and BcsC) display greater sequence diversity as indicated by a larger  
259 number of sequence clusters (**Figure 3**). Detailed structure-function studies of the BcsA-BcsB inner-  
260 membrane cellulose synthase complex, outlined below, illustrate how these findings are consistent with  
261 their known functional roles. Further inspection of the cellulose operon network identifies a number of  
262 sub-networks comprised of taxon-specific loci clusters associated with distinct patterns of operon  
263 organization as illustrated through the following examples: 1) a subnetwork comprised of loci from

264 several beta-proteobacteria, represented here by *Burkholderia cenocepacia* and *Pandoraea promenusa*  
265 (**Figure 3(i)**), which feature a rearrangement of the *bcsA* locus and novel locus gains (also supported by  
266 inspection of corresponding Genbank genomic annotations) as indicated by a genomic distance of > 0.1  
267 Kbp between *bcsA* and the neighbouring locus *bcsC*; 2) a subnetwork composed of loci from several  
268 species of the alpha-proteobacterial *Zymomonas*, feature rearrangement of *bcsZ* and/or the loss of *bcsB*  
269 or *bcsZ*; further inspection reveal such losses to be due to gene fusion events (**Figure 3(ii)**); 3) a  
270 subnetwork composed of loci from a separate group of alpha-proteobacteria, reveals a diverse set of  
271 *bcsB* loci that additionally lack the *bcsC* outer membrane pore (**Figure 3(iii)**); and 4) a subnetwork of  
272 loci from a group of gamma-proteobacteria reveal instances of HGT and divergence (**Figure 4A**). In  
273 this latter example, our network identifies two distinct clades of operons, sharing a common group of  
274 *bcsA* loci, but featuring two evolutionarily divergent sets of *bcsB*, *bcsZ* and *bcsC* loci which co-occur in  
275 several genomes separated by inter-genic distances greater than 10kbp. Detailed investigation of the  
276 operonic arrangements of species possessing single copies of either of these clades of operons, reveal  
277 two distinct loci organizations: the first representing the canonical cellulose locus order (clade A1),  
278 *bcsABZC*, found among *Escherichia coli* and *Salmonella enterica* strains; the second represents a non-  
279 canonical locus ordering (clade B1), in which the periplasmic glycoside hydrolase, *BcsZ*, has  
280 undergone a rearrangement, *bcsABCZ*, and is found among *Dickeya*, *Erwinia* and *Pantoea* spp. (**Figure**  
281 **4B**). Of note, we found that several species (e.g. *Enterobacter* and *Klebsiella* spp.) possess both operon  
282 clades, which have previously been inferred as originating by HGT(19) and is further supported by our  
283 phylogenetic clustering assignments (**Figure 4C**). Furthermore, we identified two additional divergent  
284 *BcsB* sequences associated with a novel organization of operon clade B1 and include several loci with  
285 other roles in cellulose production (designated operon clade B2; **Figure 4D**). The divergence of *BcsB*  
286 sequences associated with clade B2 were also found to distinguish bacterial genomes possessing  
287 multiple cellulose operons of distinct evolutionary lineages: *Proteus mirabilis* (2 cellulose operons:

288 Clades A1 and B2) and *Enterobacter* spp. (3 cellulose operons: Clades A1, B1 and B3) (Figure 4E).  
289 Additional sequence database searches revealed that the non-core loci associated with operon clades B2  
290 and B3 share functionally homologous loci to the cellulose accessory protein D (AxcD), which has  
291 been characterized as increasing the efficiency of cellulose production in the *Acetobacter xylinus*  
292 cellulose synthase complex(34); GalU an uridine triphosphate (UTP)-glucose-1-phosphate  
293 uridylyltransferase involved in cellulose precursor biosynthesis; and an additional uncharacterized  
294 locus predicted to possess both PAS\_9 and GGDEF signalling domains, indicating the potential  
295 adaptation in *Proteus* and *Enterobacter* spp. to produce varied forms of cellulose upon different  
296 environmental stimuli(35).

297

298 **Genomic-Proximity Networks of *pel* Operons Reveal a Novel *pel* Locus in the Gram Positive**  
299 **Bacterium, *Bacillus cereus* that is Regulated by c-di-GMP**

300 Examination of the genomic-proximity networks of *pel* loci also reveal novel operon organizations  
301 across phylogenetically divergent bacteria (**Figure 5**). As with cellulose loci *bcsA* and *bcsZ*, we identify  
302 examples of operon rearrangements involving *pelB* (outer membrane transport pore + TPR domain)  
303 loci and *pelA* (periplasmic modification hydrolase) (**Figure 5(ii), (iii), (iv)**), across several species  
304 associated with diverse environments. Again consistent with our findings for cellulose, we noted loci  
305 losses and acquisitions. Although it has not been demonstrated that the *pel* operon forms a trans-  
306 envelope biosynthetic complex, the ordering of operon loci has been shown to play an important role in  
307 the assembly of macromolecular complexes(36) and optimizing biosynthetic pathways(37), suggesting  
308 that there exists a functional coupling between *pel* outer-membrane transport and periplasmic  
309 modification(38). However, the effects of these rearrangement events on Pel production still remain to  
310 be experimentally investigated.

311

312 We also observed a high degree of overall conservation among components which are known to play  
313 key roles in Pel biogenesis, such as the putative polysaccharide synthase (PelF), putative inner-  
314 membrane protein (PelG), hydrolase/deacetylase (PelA) and cyclic-di-GMP receptor (PelD)(21). In  
315 contrast, a greater degree of divergence can be seen among inner (PelE) and outer-membrane (PelB,  
316 PelC) transport associated loci, which appear to follow a consistent pattern of clustering across  
317 bacterial phyla suggesting co-evolution of potentially physically interacting components, however no  
318 evidence of interaction has been shown to date.

319  
320 Our genomic proximity network revealed two distinct clades comprising several Gram-positive species  
321 (**Figure 5(v)**). Of the synthase dependent EPS operons known to date, only PNAG production has been  
322 genetically and structurally characterized in Gram-positive Staphylococci(39). Operons reconstructed  
323 from initial HMM searches identified putative *pel* operons in several Gram-positive bacteria,  
324 comprised of the GT encoding PelF and the PelG putative transport protein (**Figure 5**). To determine  
325 whether these were bona-fide *pel* operons with additional loci, iterative HMM searches were performed  
326 including additional protein sequences from predicted *pel* operons, revealing additional loci including a  
327 homolog of PelD (**Supplemental Figure 3**). C-di-GMP signaling in Gram-positive bacteria is less well  
328 characterized(40) and this finding provides evidence for its role in regulating biofilm formation in these  
329 species. In our companion paper, we have experimentally validated our predictions by showing that  
330 single deletion knockouts of the predicted *B. cereus* operon loci result in a loss of EPS production, and  
331 that PelD regulates EPS production through binding of c-di-GMP (BIORXIV/2019/768473).

332  
333 **Genomic-Proximity Networks of PNAG Uncover Locus Loss and Duplication Events in**  
334 **Pathogenic and Environmental Bacteria**

335 To examine how locus duplication, loss, and rearrangement events have contributed to the evolution of  
336 PNAG operons across bacterial phyla, selected examples of *pga* operon clusters were identified and  
337 compared (**Supplemental Figure 4**). For example, within a group of enterobacteria possessing related  
338 *pgaD* loci, there exist a number of closely related pathogen enterobacteria that have lost *pgaA* (*E. coli*  
339 ETEC H10407), as well as *pgaB* (*Shigella flexneri* 5 str. 8401), suggesting the recent loss of the ability  
340 to produce PNAG (**Supplemental Figure 4(i.a)**); in the case of *S. flexneri* this loss may be due to  
341 adaptation to an intracellular mode of infection(41). Similarly, no *pga* operons were detected among  
342 *Salmonella* spp. genomes surveyed in this study, consistent with the loss of PNAG production  
343 previously associated with an intracellular pathogenic lifestyle(42).

344

345 Based on the divergence of *pgaB* loci, we also identified *pga* operon clades corresponding to partial  
346 and whole operon duplications in aquatic bacteria, including a partial duplication of the *pga* operon  
347 specific to *Acinetobacter baumannii* spp. and *Methylovora versatilis* 301, respectively (**Supplemental**  
348 **Figure 4(ii)**). Also, in environmental bacteria we discovered a novel *pga* organization resulting from  
349 rearrangement of *pgaC*, and a lack of *pgaB* and *pgaD* loci, which may have been too divergent to  
350 detect from initial HMM searches (**Supplemental Figure 4(iii)**). Although our HMM models were  
351 based on solely Gram-negative *pga* operon protein sequences, we also identified a number of Gram-  
352 positive *pga* operons consisting of *pgaB* and *pgaC* (**Supplemental Figure 4(i.b, i.c)**). Upon closer  
353 inspection these loci were found to correspond to *Staphylococcus* intercellular adhesion (ICA) loci *icaB*  
354 and *icaA*, respectively, suggesting a potential common evolutionary origin of synthase-dependent  
355 PNAG production between Gram-positive and -negative organisms.

356

357 A clade of *pga* operons were also identified possessing varying numbers of divergent *pgaC* loci  
358 resulting from repeated tandem duplication events (**Supplemental Figure 4(v)**). Despite lacking a

359 detectable *pgaA* locus, a possible role of these gene clusters in EPS production was investigated. One  
360 member of this operon clade, *Thauera* sp. MZ1T, inhabits a wide range of environments, and is an  
361 abundant producer of EPS responsible for viscous bulking in activated sludge wastewater treatment  
362 processes(43). Furthermore, a recent mutagenesis study(44) demonstrated that biofilm-formation  
363 defective *Thaurea* mutants could be rescued by the complementation of the predicted *pgaB* deacetylase  
364 locus identified in the present study. Combined with our evolutionary clustering results, these findings  
365 suggest that the divergence of deacetylase and duplication of GT related-loci in PNAG biosynthesis  
366 have resulted in the emergence of a distinct operon lineage.

367

### 368 **Genomic Proximity Networks of Alginate Uncover Distinct Operon Clades in *Pseudomonas* spp.** 369 **and Atypical Operon Architectures in Environmental Bacteria**

370 Although the majority of alginate operons were predicted largely among *Pseudomonas* spp. genomes  
371 (**Supplemental Figure 5**), phylogenetic clustering and genomic-proximity network reconstruction  
372 revealed an array of events influencing alginate operon evolution. For example, two distinct alginate  
373 operon clades were identified among *Pseudomonas* spp., defined by whole operon duplication and  
374 rearrangement of alginate polysaccharide modification loci (**Supplemental Figure 5(i) and (ii)**). Also  
375 identified were divergent, “atypical”, alginate operons (**Supplemental Figure 5(iii)**) comprising  
376 extensive rearrangements and also losses of functionally related subsets of alginate loci, e.g. outer-  
377 membrane transport loci (*algKE*), and polysaccharide modification machinery (*algGXLIJF*). Closer  
378 examination of the alginate genomic-proximity network also indicated a greater number of clusters for  
379 *alg44* and *algX* loci, which were reflective of increased divergence among distinct alginate operon  
380 clades. Given that both loci play related roles in the regulation, polymer-modification, and assembly of  
381 the alginate EPS secretion machinery(45), these results provide an avenue for future research toward  
382 elucidating how species may modify alginate production to adapt to diverse environmental niches.



383

384 **Genomic Proximity Networks of Acetylated-Cellulose Operons Reveals Duplication of**

385 **Copolymerase Subunits and Sequence Homology of Loci with Alginate Acetylation Machinery**

386 From the genome sequences surveyed, only four species were identified as possessing acetylated-

387 cellulose operons, comprising two distinct operon clusters with differing operon constitutions among

388 three *Pseudomonas* spp. and *Bordetella avium* 197N (**Supplemental Figure 6**). Contrary to cellulose

389 phylogenetic clusters, the polysaccharide synthase, *wssB*, was divided into distinct Gamma- and Beta-

390 proteobacterial clusters. We also found a distinct phylogenetic cluster identifying a unique tandem

391 duplication of *wssC* in *Bordetella avium* 197N, which was not observed among orthologous cellulose

392 *bcsB* copolymerase loci (**Supplemental Figure 6 (ii)**). This observation might suggest a divergent

393 mechanism of action of cellulose inner-membrane transport. As we previously observed (**Figure 1**), 3

394 out of 4 of the predicted acetylated-cellulose operons were also found to co-occur with alginate

395 operons. Additional HMM-searches identified significant sequence similarity between acetylated-

396 cellulose *wssBCDE* operon sequences to those previously identified as *bcsABZC*, as well as between

397 acetylated-cellulose acetylation-machinery and their functional homologs in alginate operons (WssH –

398 AlgI; WssI – AlgJ/AlgX). Taken together, these findings suggest that acetylated cellulose production

399 has likely evolved through the duplication and operonic acquisition of the alginate acetylation

400 machinery loci.

401

402 **Sequence Variability of Phylogenetic Clusters Reveals Different Degrees of Structural**

403 **Conservation of Cellulose Biosynthesis Machinery**

404 With the availability of a crystal structure for the BcsA-BcsB inner membrane complex responsible for

405 cellulose biosynthesis and transport(46), we examined the potential structural and functional

406 consequences of the sequence variability of the BcsA and BcsB phylogenetic clusters highlighted

407 above (**Figure 3**). In brief, we generated multiple sequence alignments of eight BcsA and BcsB  
408 sequences summarizing the evolutionary diversity of cellulose operon clades identified in **Figure 3**.  
409 Residue conservation information from this alignment were subsequently mapped onto the structure of  
410 the BcsA-BcsB complex (PDB ID:4HG6 (47); **Supplemental Figure 7**). The results of the following  
411 analysis are also consistent when including all predicted BcsA and BcsB sequences. We identified a  
412 high degree of sequence conservation among BcsA sequences corresponding to the GT domain  
413 responsible for cellulose polymerization. Conserved residues mapped specifically to a cleft in the GT  
414 domain where a uridine diphosphate (UDP) carrier moiety is bound and oriented through a conserved  
415 QxxRW motif to enable polymerization of glucose monomers of the growing cellulose chain(46).  
416 Conversely, the PilZ domain of BcsA, involved in regulation of the GT function in response to c-di-  
417 GMP levels shows low conservation overall, except for the subset of residues required for c-di-GMP  
418 binding. Further, the periplasmic region of BcsB shows low sequence conservation overall, aside from  
419 a number of highly conserved residues in the carbohydrate binding and ferredoxin domains, one of  
420 which (L193 of the *Rhodobacter sphaeroides* ATCC 17025 reference sequence) is a putative cellulose  
421 binding residue oriented in close proximity to the growing cellulose chain near the exit of the BcsA IM  
422 translocation channel. From phylogenetic sequence clustering, structurally relevant conservation  
423 features of the cellulose synthase complex can be identified which should facilitate further  
424 investigation of cellulose EPS production across phylogenetically diverse species. For example, c-di-  
425 GMP binding residues of the PilZ domain of BcsA vary in conservation across phylogenetic clusters,  
426 which could impact the binding affinity and limit access of activated glucose monomers to the GT  
427 domain, thus limiting the rate of cellulose polymerization. Insertion/deletion events are also observed  
428 across BcsB phylogenetic clusters that may facilitate the recruitment of additional periplasmic  
429 processing proteins(48), or macromolecular assembly of the BcsA-B complex(49), resulting in  
430 differences in the higher-ordered structuring of cellulose microfibrils as a consequence of adaptation to

431 diverse environmental niches. These results demonstrate how the application of our phylogenetic  
432 clustering methodology can be further extended to provide biologically informative insights into the  
433 function of other components of EPS secretion machineries.

434

435 **Phylogenetic Clustering Elucidates the Structural and Functional Divergence of the *pgaB* Locus,**  
436 **Revealing the Evolution of PNAG Production Across Gram-negative and Gram-positive Bacteria**

437 PNAG production is found across phylogenetically diverse species and is carried out by the *pgaABCD*  
438 operon of Gram-negative(29) and *icaADBC* operon of Gram-positive (50) bacteria. Although the  
439 functional and immunological properties of *pga* and *ica* produced PNAG appear to be similar(54),  
440 there are important differences between the roles of *pga* and *ica* operon loci(53). Common to both  
441 operons is the presence of an integral membrane GT locus, *pgaC* and *icaA*, which are both members of  
442 the GT-2 family and share sequence homology(53). In addition, non-homologous loci encoding integral  
443 membrane proteins, *pgaD* and *icaD*, are also present and required for the full function of their  
444 respective GTs(54,55). In Gram-negatives, PNAG production is regulated through physical interactions  
445 between PgaD and PgaC which are stabilized by the allosteric binding of c-di-GMP(56), while in  
446 *Staphylococci* PNAG production does not depend on c-di-GMP and is likely regulated by an alternate  
447 signaling pathway(57). Deacetylation of PNAG is carried out by *pgaB* and *icaB* loci and has been  
448 shown to play a crucial role in biofilm formation and immune evasion(52,58). *pgaB* also possesses an  
449 additional C-terminal glycoside hydrolase domain which cleaves the PNAG polymer following its  
450 partial deacetylation(59), although the mechanism of how these activities are coordinated and the  
451 biological role of the hydrolase activity is unknown. Unique to *pga* operons is a loci encoding an outer  
452 membrane export pore, *pgaA*(60), and in *ica* operons an additional integral membrane protein, *icaC*,  
453 which has been proposed to be involved in PNAG O-succinylation(53). Using Gram-negative *pga* loci  
454 as seed sequences for the reconstruction of synthase-dependent PNAG operons, we were also able to

455 identify Gram-positive *ica* operons based on significant sequence similarities to *pgaB* and *pgaC* loci.  
456 Our phylogenetic clustering approach also revealed that *pgaC/icaA* sequences clustered into a single  
457 clade, while *pgaB/icaB* were associated with distinct sequence clades (**Supplemental Figure 4**). To  
458 explore the evolution of Gram-negative and Gram-positive *pga* and *ica* operons, we generated multiple  
459 sequence alignments for representative sequences of 18 PgaB clades. Our phylogenetic clustering  
460 results confirm previous observations(53) that the glycoside hydrolase domain is exclusively associated  
461 with Gram-negative *pga* operons (PgaB\_G1) and is absent in a clade of *Staphylococcus* Gram-positive  
462 *ica* sequences (PgaB\_G3) (**Supplemental Figure 8A**). We also identified additional Gram-positive  
463 *icaB* clades among non-*Staphylococcus* spp., e.g. *Bacillus*, *Lactococcus*, and *Mycobacterium*  
464 (**Supplemental Table 1**), which possess operons lacking the *icaC* locus(53). Interestingly, we also  
465 identified a number of divergent Gram-negative *pgaB* clades resembling *icaB* clade sequences.  
466 Members of these clades lacked the canonical N-terminal glycosyl hydrolase domain, and were  
467 distinguished by possessing N-terminal fusions, primarily of GT domains. Furthermore these *pgaB*  
468 clades are associated with operons lacking detectable *pgaA* outer membrane pore locus and *pgaD*  
469 (**Supplemental Figure 4 (v)**). Although PNAG production in these species has not been  
470 experimentally confirmed, these findings suggest if the polymer is produced it is under a novel mode of  
471 regulation by c-di-GMP, that glycoside hydrolase activity might not be essential for PNAG export  
472 across all Gram-negative species, and that other modes of export may exist. The fusion of would also  
473 suggest that the de-acetylase activity of PgaB in these organisms may be associated with the  
474 periplasmic face of the inner membrane, in contrast to dual domain PgaB clades where the protein is  
475 predicted to function at the periplasmic face of the outer membrane(60).

476

477 In addition to these novel domain fusion events, PgaB phylogenetic clustering enabled us to resolve  
478 distinct events affecting the evolution of the deacetylase domain across different operon clades. Using

479 the *E. coli* K12 MG1655 sequence of the largest PgaB clade (PgaB\_G1) as a reference, multiple  
480 sequence alignments against other representative PgaB clade sequences identified several regions of  
481 insertion/deletion events (**Supplemental Figure 8A**). When these regions were mapped to the  
482 published crystal structure of PgaB (PDB ID: 4F9D(61)), they were found to correspond to distinct  
483 structural elements surrounding the conserved deacetylase core (**Supplemental Figure 8B-C**). We  
484 assigned insertion/deletion regions a number according to their order of appearance in the multiple  
485 sequence alignment of PgaB deacetylase domains, and divided them into two categories  
486 (**Supplemental Figure 8D**). The first two indel regions, 1 and 2, resided in the N-terminal region of the  
487 reference *E. coli* sequence, and corresponded to beta-strands flanking the conserved active site residues  
488 involved in deacetylation, His55, Asp114, and Asp115. Region 1 was associated with Gram-positive  
489 *icaB* and comprised insertions of ~10aa in *Staphylococcus aureus* VC40 (PgaB\_G3), as well as  
490 *Bacillus infantis* NRL B-14911 (PgaB\_G7), *Lactobacillus plantarum* 16 (PgaB\_G9), *Leptospirillum*  
491 *ferriphilum* ML-04 (PgaB\_11). Structural characterization of *Ammonifex degensii* IcaB (PgaB\_G3)  
492 identified residues overlapping with Region 1 as encoding a hydrophobic loop responsible for  
493 membrane localization in this species(62). Region 2 was found to be exclusive to Gram-negative *pgaB*  
494 loci and comprised a much larger insert of ~77aa in *Geobacter metallireducens* GS-15 (PgaB\_G2),  
495 *Crinalium epipsammum* PCC 9333 (PgaB\_G5), and *Colwellia psychrerythraea* 34H (PgaB\_6). The  
496 functional role of this insert is unknown.

497

498 The last three insertion/deletion regions, 3-5, occurred in a region oriented away from the deacetylase  
499 active site, and correspond to two beta-turn motifs and an alpha-helix cap, respectively. To further  
500 elucidate the biological import of identified PgaB indel regions, we examined regions 3, and 5 in the  
501 context of Gram-negative PNAG modification. In the *E. coli* K12 MG1655 PgaB\_G1 sequence, region  
502 3 encompasses a beta-turn with an elongated loop, which is spatially proximal to a disordered loop and

503 alpha helix (pos. 367-392) on the N-terminal region of the PgaB glycoside hydrolase domain. Region 3  
504 also encodes a histidine (*E. coli* PgaB - H189) which is part of the Ni binding pocket of Gram-negative  
505 PgaB deacetylases. Both regions contain polar and electrostatically charged residues which are highly  
506 conserved across PgaB\_G1 sequences (**Supplemental Figure 8E**). Region 5 corresponds to an 8 amino  
507 acid elongation of an alpha-helix (pos. 219-226) , which also appears to provide an additional point of  
508 contact between the deacetylase and hydrolase domains. Although region 5 is also shared with *icaB*  
509 associated sequences (PgaB\_G3), region 3 appears only in other dual deacetylase-hydrolase Gram-  
510 positive *pgaB* sequences identified in the sporulating bacteria *Lachnoclostridium phytofermentans*  
511 ISDg and *Kitasatospora setae* KM-5043. Although initial PFAM searches failed to identify the  
512 additional Gram-positive C-terminal domains, subsequent BLAST searches revealed them to be  
513 homologous to glycoside hydrolases. In region 4 a unique 29 amino acid insertion was also identified  
514 in *Lachnoclostridium phytofermentans* ISDg (PgaB\_G16), which may play a compensatory role for the  
515 absence of 9aa in region 3. These insertion regions suggest an overall functional importance in  
516 ensuring stability between each domains and could play a role in coordinating their activities. These  
517 findings in combination with our identification of *ica*-like operon organizations among environmental  
518 Gram-negative species (**Supplemental Figure 4(v)**) suggest that Gram-negative *pga* operons may  
519 share a common evolutionary origin with Gram-positive *ica* operons. Recent research is providing  
520 growing evidence for the emergence of the di-derm Gram-negative architecture from sporulating  
521 monodermal Gram-positives (64), which provides a plausible evolutionary context for the  
522 insertion/deletion events observed among *pgaB/icaB* deacetylase domains. Through the loss of inner  
523 membrane localization(62) (Region 1), the compensatory gain of an N-terminal palmitoylation site(54),  
524 along with a C-terminal fusion of a hydrolase domain (Regions 3-5), an ancestral deacetylase locus  
525 may have been adapted to regulate the export of PNAG(54) at the outer membrane of Gram-negative  
526 *pga* operon lineage.

527

## 528 **DISCUSSION**

529 In this work we describe a novel and generalizable approach for the systematic classification and  
530 presentation of bacterial protein families in the context of their host operon. Protein families are  
531 defined as sets of homologs (groups of related sequences having a common evolutionary ancestor)  
532 sharing a particular set of sequence motifs or structural domains that can be utilized to determine their  
533 biological roles. For example, the PFAM database utilizes curated sets of protein family sequences in  
534 the generation of profile HMMs(64). A key challenge that complicates the definition of these  
535 relationships are evolutionary events such as duplication, gene fusion, and HGT. In attempts to account  
536 for such events, a variety of computational approaches have been developed for refining functional  
537 assignments either by graphical clustering of pair-wise protein sequence similarities (e.g, COG(65),  
538 OrthoMCL(13) and EggNOG(14)), or through the generation of hierarchical evolutionary relationships  
539 and construction of phylogenetic trees (e.g. TreeFAM(66) and TreeCL(67)). However, these methods  
540 are limited in their ability to provide further resolution of sequence diversity within a family that might  
541 otherwise offer additional insights into evolutionary events that allow taxa to adapt to specific  
542 environments.

543

544 Agnostic approaches to define sub-clusters of evolutionarily related protein families have ranged from  
545 phylogenetic tree reconstructions (68) to hierarchical clustering of pairwise global sequence  
546 alignments(69). Here we present an extension of previous efforts, and introduce a novel systematic  
547 approach for defining protein sub-family relationships through the clustering of phylogenetic trees. Key  
548 to this approach is defining a scoring function that allows a phylogenetic tree to be resolved into  
549 optimal clusters that best capture the similarities between cluster members, as well as the dissimilarities  
550 between clusters. Combining two clustering quality metrics (Silhouette and Dunn index) and

551 proportion of sequences clustered, we demonstrate that our approach is able to classify a diverse array  
552 of operon-associated protein families into taxonomically consistent and functionally informative sub-  
553 clusters. Genomic-proximity networks were also constructed to provide an intuitive means of utilizing  
554 phylogenetic clusters to examine diverse mechanisms of operon evolution across taxonomically diverse  
555 bacterial genomes. Genomic-proximity networks have previously been utilized for inferring functional  
556 relationships(70), understanding mechanisms underlying bacterial genomic organization into  
557 functionally related gene clusters(71), and transcriptional regulation of bacterial operons(72). In this  
558 study we extend the application of genomic-proximity networks as a tool for the systematic exploration  
559 of operon evolution resulting from locus divergence, loss, duplication, and rearrangement events.

560

561 To demonstrate the effectiveness of our approach, we applied our methods to classify the stynthase-  
562 dependent bacterial EPS operon machineries for 5 different polymers: cellulose, acetylated-cellulose,  
563 alginate, Pel and PNAG. There has been only one previous attempt to classify synthase dependent EPS  
564 operons and this focused specifically on the cellulose system(25). In that study, cellulose operons were  
565 categorized into four major types, based on the presence or absence of experimentally validated  
566 accessory loci involved in cellulose production. Here, we based our analysis on the four core operon  
567 loci, *bcsABZC*, deemed essential for cellulose production. Cellulose operon clades identified in this  
568 study showed little consistency with the previously defined four major cellulose operon types(25),  
569 suggesting that the conservation of accessory loci is more variable across bacterial species compared to  
570 loci encoding core EPS functionalities. However, one operon type was identified in this analysis,  
571 representing the loss of the BcsC outer membrane transporter identified among a subset of alpha-  
572 proteobacterial genomes, which include several known cellulose producing species(47,73) suggesting a  
573 novel mechanism of cellulose export(**Figure 3(iii)**)(25). We also found that the loss of BcsC has



574 resulted in an increased divergence of BcsB loci in these genomes, which highlights the key role of  
575 BcsB as an intermediary between cellulose biogenesis and periplasmic transport (**Figure 6**).

576

577 In general, inner membrane components involved in EPS polymerization were found to be relatively  
578 conserved across all systems examined, while periplasmic and outer-membrane components showed a  
579 relatively increased degree of evolution, which are likely to have important functional implications. For  
580 example, in the cellulose and Pel operon networks (**Figures 3 and 5, and Supplemental Table 4**),  
581 rearrangement events involving the periplasmic glycosyl hydrolase (BcsZ) and glycosyl  
582 hydrolase/deacetylase (PelA) were found to be a defining feature of several operon clades. It is  
583 interesting to note that these rearrangements have resulted in a change in the ordering of *bcsZ* and *pelA*  
584 relative to their respective outer-membrane transport pore loci, which highlights the important role of  
585 polysaccharide modification in both the biogenesis and regulating extracellular EPS transport(20,38,74).  
586 Similarly, the rearrangement of alginate modification machinery loci (*algIJF*) was observed as a  
587 distinguishing feature of *Pseudomonas* spp. operon clades. These findings suggest that rearrangement  
588 and locus ordering may serve as an important means of regulating EPS production by modifying the  
589 timing of translation of modification enzymes, which could affect the assembly of EPS complexes or  
590 the structural properties of EPS produced (37,49,75).

591

592 Furthermore, identifying operon clades through a phylogenetic approach elucidated numerous instances  
593 of cellulose whole operon duplications arising from HGT of two evolutionary distinct operon clades  
594 (**Figure 4**). Such large-scale duplications, if they are functional, may either serve as a dosage response  
595 to given environmental stressors, as observed in the duplication of bacterial multiple-drug transporter  
596 operons(76), or could be under the regulation of different environmental stimuli. Interestingly,  
597 representative species of the two cellulose operon lineages identified in HGT events, e.g. the plant and

598 human pathogens, *D. dadantii* and *S. enterica*, respectively, are known to produce structurally distinct  
599 forms of cellulose with different properties and roles in pathogenesis(77,78). Furthermore, we  
600 identified that BcsB divergence was also seen to accompany the rearrangement or horizontal transfer of  
601 these operons, which further suggests that it may play a key role in the fine-tuning of cellulose  
602 production by coordinating the export of growing cellulose polymers through the periplasm.  
603 Furthermore, our analyses of acetylated-cellulose, alginate and PNAG operons suggest a dynamic  
604 evolutionary scenario for the evolution of EPS biofilm production through the acquisition of novel  
605 polysaccharide modification loci. The limited number of acetylated-cellulose operons identified, their  
606 frequent co-occurrence in alginate possessing species, and significant sequence similarities between  
607 acetylation machinery loci, suggests that the cellulose acetylation machinery is likely to have originated  
608 from previously existing alginate operons in *Pseudomonas* spp. The evolutionary trajectories of Gram-  
609 positive and Gram-negative PNAG operon lineages appears to have resulted through the fusion of  
610 glycosyl hydrolase and deacetylase domains in Gram-negative *pgaB* loci..

611

612 A further key finding from this study was the identification of homologous *pel* operons in the genomes  
613 of several Gram-positive bacteria. With the additional identification of homologs of PelD through  
614 iterative HMM searches, our analyses have uncovered a novel example of c-di-GMP regulation of  
615 biofilm machinery in Gram-positive bacteria. In the accompanying paper we experimentally validate  
616 that a predicted *pel*-like operon in *B. cereus* ATCC 10987 is responsible for biofilm production which is  
617 regulated by the binding of c-di-GMP to PelD (Whitfield et al submitted).

618

619 Together this work demonstrates a novel integrative approach combining phylogenomics and genomic-  
620 context approaches to systematically explore the adaptive implications of sequence divergence of  
621 protein families associated with operon associated EPS secretion machineries. Further extension of this

622 work holds great potential as a general approach for elucidating how bacterial operon encoded  
623 biological pathways and complexes have contributed to bacterial adaptation to and survival in diverse  
624 environmental niches and lifestyles.

625

## 626 **METHODS**

### 627 **Sources of Data**

628 Sequences corresponding to experimentally characterized EPS operon loci were obtained from the  
629 National Centre for Biotechnology Information (NCBI) reference sequence database(79)  
630 (**Supplemental Table 3**). Fully sequenced genomes and associated protein sequences were obtained for  
631 1861 bacteria from the NCBI (Retrieved April 20th 2015) (**Supplemental Table 6**). For each bacterial  
632 strain predicted to possess an EPS operon, metadata corresponding to niche (host-associated or  
633 environmental) and lifestyle (pathogenic or non-pathogenic) were collated from literature searches  
634 (**Supplemental Table 7**).

635

### 636 **Prediction of EPS operons**

637 To identify putative EPS operons, we applied an iterative HMM-based sequence similarity profiling  
638 strategy. For each set of EPS loci, we first constructed a HMM; alignments were constructed using  
639 MUSCLE v.3.8.1551(80), with default settings, from which HMM-models were built using HMMER  
640 v.3.1b2(81), with default settings. Each HMM was then used to identify additional EPS loci within the  
641 set of 1861 bacterial genomes. The 20 non-redundant sequences (as defined by >97% sequence  
642 similarity; i.e. to eliminate sequences from closely related strains) that had the highest scoring matches  
643 (as defined by e-values) were then retrieved and added to the original set of loci to construct a new set  
644 of HMMs. Using these new sets of HMMs, sets of EPS loci for the reconstruction of EPS operons (see

645 below) were predicted through sequence similarity searches of the 1861 genomes using HMMER, with  
646 default settings. Significant sequence matches were defined as those with E-values  $\leq 1e-5$ .

647

648 To reconstruct putative EPS operons from the sets of loci retrieved from our searches, we first retrieved  
649 locus start and stop positions for each locus from their RefSeq entry. We then define putative operons  
650 using the following two rules: first only loci that occur within a distance of twice the size of a reference  
651 EPS operon to other loci are considered; second intergenic distances of individual loci must be  $\leq 5$   
652 Kbp; third putative operons must consist of at least one locus encoding a putative polysaccharide  
653 synthase, together with at least one other locus. To detect previously undiscovered loci that may have  
654 been missed in the first rounds of HMM searches, predicted loci of reconstructed operons were used to  
655 generate expanded locus-specific HMM models and were subjected to an additional round of HMM  
656 searches. This process was performed using custom Perl scripts and results in a list of predicted EPS  
657 operons identified in each of the 1861 genomes.

658

### 659 **Classification of Evolutionary Events**

660 For each EPS system (cellulose, acetylated-cellulose, PNAG, pel, and alginate), the locus assignments  
661 of each reconstructed operon was compared to a defined reference EPS operon compositions and locus  
662 ordering (**Supplemental Table 4**) and were classified into the following evolutionary events; 1) locus  
663 losses - the total number of reference loci missing or not detected by HMM searches; 2) locus  
664 duplications – number of distinct loci appearing as multiple significant hits to the same HMM model <  
665 10kBP apart; 3) locus fusions – the number of loci that were significant hits to two or more reference  
666 EPS locus HMM models; 4) operon rearrangements – the number of predicted operons with locus  
667 ordering (accounting for transcriptional direction) different from the reference operon; 5) operon

668 duplications – number of predicted operons (as defined above) present in the same genome  $\geq 10$  Kbp  
669 apart.

670

### 671 **Classification of EPS loci**

672 Systematic classification of each EPS operon family starts with first merging closely related sequences  
673 using CD-HIT v.4.6.3(82) with default settings (using global sequence identity threshold 0.9; word  
674 length 5) to generate a non-redundant set of sequences for each family. Multiple sequence alignments  
675 (MSAs) were then generated using MUSCLE and trimmed using trimal v.1.2rev59(83) (using -  
676 automated1 setting). The resulting alignment was then used to construct a phylogenetic tree using  
677 PhyML v.3(84), with default parameters (LG substitution model, with 1000 bootstrap replicates). For  
678 each tree, an optimal set of clusters is then generated by traversing the tree, starting at the tips and  
679 iteratively increasing evolutionary distance (defined as the number of expected amino-acid  
680 substitutions per site) between branches. At each step an evolutionary distance cutoff threshold is  
681 chosen (beginning from 0 to the maximum distance for a given tree and increasing in increments of  
682 0.01) and all sequences which share a branch less than the given threshold are assigned to the same  
683 evolutionary cluster. This results in the generation of increasingly coarse clusters of sequences with  
684 increasing sequence dissimilarity, such that in the final step all sequences are assigned to a single  
685 cluster. At this stage, for all possible clusterings three metrics are calculated and summed together to  
686 calculate a clustering quality score: (1) proportion of sequences clustered (p) number of sequences  
687 clustered / total number of sequences); (2) the average silhouette score ( $s_{avg}$ ) (85):  
688 For each sequence,  $i$ , its silhouette score,  $s(i)$ , is defined as:

$$s(i) = \frac{b(i) - a(i)}{\max(a(i), b(i))}$$

689 Where  $a(i)$ =average evolutionary distance (expected number of substitutions per site)  $i$  is the lowest  
690 average evolutionary distance to any other cluster of which  $i$  is not a member; and (3) Dunn index  
691 (DI)(86), for a set of  $m$  clusters, its Dunn index,  $DI$ , is defined as:

692

$$693 \quad DI = \frac{\min_{1 \leq i \leq j \leq m} \delta(C_i, C_j)}{\max_{1 \leq k \leq m} \Delta_k}$$

694 Where  $DI$  is the evolutionary distance between clusters  $i$  and  $j$  and  $\Delta_c$  is the size of cluster  $c$ . Note that  
695 a higher  $s(i)$  indicates that a sequence is well matched to other members of its cluster and not well  
696 matched to neighbouring clusters. Furthermore, a higher  $DI$  indicates clusters that are compact (smaller  
697 cluster sizes) and well differentiated (larger inter-cluster distances). Thus, the evolutionary distance  
698 cutoff which maximizes  $p + s_{avg} + DI$  is chosen as the optimal phylogenetic clustering for a given set  
699 of EPS locus sequences.

700

### 701 **Construction of EPS Operon Genomic-Proximity Networks**

702 To visualize evolutionary and genomic organization relationships of predicted EPS operons, genomic  
703 proximity networks were generated in which each node represents an individual EPS locus cluster (as  
704 defined above), and an edge connecting a pair of nodes represents the average genomic distance (base  
705 pairs) between loci represented by each node found in the same genome. Further, nodes are represented  
706 as pie-charts indicating phylogenetic distribution of each EPS locus, as defined by NCBI taxonomic  
707 classification scheme. Networks were visualized using Cytoscape (version 3.5)(87).

708

### 709 **ACKNOWLEDGEMENTS**

710 JP and CB-T were supported by grants from the Natural Sciences and Engineering Research Council  
711 (RGPIN-2014-06664 & RGPIN-2019-06852) and the National Institutes of Health (R21AI126466).

712 This work was also supported in part by grants from the Canadian Institutes of Health Research (CIHR)  
713 (MOP 43998 and FDN154327 to PLH). PLH is a recipient of a Canada Research Chair. GBW and  
714 LSM have been supported by graduate scholarships from the Natural Sciences and Engineering  
715 Council of Canada (NSERC). GBW has been supported by a graduate scholarship from Cystic Fibrosis  
716 Canada. LSM has been supported by graduate scholarships from the Ontario Graduate Scholarship  
717 Program, and The Hospital for Sick Children Foundation Student Scholarship Program. Computing  
718 resources were provided by the SciNet HPC Consortium; SciNet is funded by: the Canada Foundation  
719 for Innovation under the auspices of Compute Canada; the Government of Ontario; Ontario Research  
720 Fund–Research Excellence and the University of Toronto.

721

722

723

724

## 725 REFERENCES

726

- 727 1. Marcotte EM, Pellegrini M, Ng HL, Rice DW, Yeates TO, Eisenberg D. Detecting protein  
728 function and protein-protein interactions from genome sequences. *Science*. 1999 Jul  
729 30;285(5428):751–3.
- 730 2. Mao X, Ma Q, Zhou C, Chen X, Zhang H, Yang J, et al. DOOR 2.0: presenting operons and their  
731 functions through dynamic and integrated views. *Nucleic Acids Res*. 2014 Jan;42(D1):D654–9.
- 732 3. Ermolaeva MD, White O, Salzberg SL. Prediction of operons in microbial genomes. *Nucleic  
733 Acids Res*. 2001 Mar 1;29(5):1216–21.
- 734 4. Serres MH, Kerr ARW, McCormack TJ, Riley M. Evolution by leaps: gene duplication in  
735 bacteria. *Biol Direct*. 2009 Nov 23;4(1):46.
- 736 5. Wapinski I, Pfeffer A, Friedman N, Regev A. Natural history and evolutionary principles of gene  
737 duplication in fungi. *Nature*. 2007 Sep 6;449(7158):54–61.
- 738 6. Ling X, He X, Xin D. Detecting gene clusters under evolutionary constraint in a large number of  
739 genomes. *Bioinformatics*. 2009 Mar 1;25(5):571–7.
- 740 7. Ream DC, Bankapur AR, Friedberg I. An event-driven approach for studying gene block  
741 evolution in bacteria. *Bioinformatics*. 2015 Jul 1;31(13):2075–83.
- 742 8. Saurin W, Hofnung M, Dassa E. Getting in or out: early segregation between importers and  
743 exporters in the evolution of ATP-binding cassette (ABC) transporters. *J Mol Evol*. 1999  
744 Jan;48(1):22–41.
- 745 9. Ranea JAG, Buchan DWA, Thornton JM, Orengo CA. Evolution of protein superfamilies and  
746 bacterial genome size. *J Mol Biol*. 2004 Feb 27;336(4):871–87.
- 747 10. Eisen JA. Phylogenomics: improving functional predictions for uncharacterized genes by  
748 evolutionary analysis. *Genome Res*. 1998 Mar;8(3):163–7.
- 749 11. Zmasek CM, Eddy SR. A simple algorithm to infer gene duplication and speciation events on a  
750 gene tree. *Bioinformatics*. 2001 Sep;17(9):821–8.
- 751 12. Altenhoff AM, Škunca N, Glover N, Train C-M, Sueki A, Piližota I, et al. The OMA orthology  
752 database in 2015: function predictions, better plant support, synteny view and other  
753 improvements. *Nucleic Acids Res*. 2015 Jan 28;43(Database issue):D240-9.
- 754 13. Chen F, Mackey AJ, Stoeckert CJ, Roos DS. OrthoMCL-DB: querying a comprehensive multi-  
755 species collection of ortholog groups. *Nucleic Acids Res*. 2006 Jan 1;34(Database issue):D363-  
756 8.



- 757 14. Huerta-Cepas J, Szklarczyk D, Forslund K, Cook H, Heller D, Walter MC, et al. eggNOG 4.5: a  
758 hierarchical orthology framework with improved functional annotations for eukaryotic,  
759 prokaryotic and viral sequences. *Nucleic Acids Res.* 2016 Jan 4;44(D1):D286-93.
- 760 15. Lazareva-Ulitsky B, Diemer K, Thomas PD. On the quality of tree-based protein classification.  
761 *Bioinformatics.* 2005 May 1;21(9):1876–90.
- 762 16. Brown DP, Krishnamurthy N, Sjölander K. Automated protein subfamily identification and  
763 classification. *PLoS Comput Biol.* 2007 Aug;3(8):e160.
- 764 17. Costa EP, Vens C, Blockeel H. Top-down clustering for protein subfamily identification. *Evol*  
765 *Bioinform Online.* 2013;9:185–202.
- 766 18. Kelil A, Wang S, Brzezinski R, Fleury A. CLUSS: clustering of protein sequences based on a  
767 new similarity measure. *BMC Bioinformatics.* 2007 Aug 4;8(1):286.
- 768 19. Whitney JC, Howell PL. Synthase-dependent exopolysaccharide secretion in Gram-negative  
769 bacteria. *Trends Microbiol.* 2013 Feb;21(2):63–72.
- 770 20. Castiblanco LF, Sundin GW. Cellulose production, activated by cyclic di-GMP through BcsA  
771 and BcsZ, is a virulence factor and an essential determinant of the three-dimensional  
772 architectures of biofilms formed by *Erwinia amylovora* Ea1189. *Mol Plant Pathol.* 2018  
773 Jan;19(1):90–103.
- 774 21. Franklin MJ, Nivens DE, Weadge JT, Howell PL. Biosynthesis of the *Pseudomonas aeruginosa*  
775 Extracellular Polysaccharides, Alginate, Pel, and Psl. *Front Microbiol.* 2011;2:167.
- 776 22. Ates O. Systems Biology of Microbial Exopolysaccharides Production. *Front Bioeng*  
777 *Biotechnol.* 2015;3:200.
- 778 23. Low KE, Howell PL. Gram-negative synthase-dependent exopolysaccharide biosynthetic  
779 machines. *Curr Opin Struct Biol.* 2018 Dec 1;53:32–44.
- 780 24. Lawrence J. Selfish operons: the evolutionary impact of gene clustering in prokaryotes and  
781 eukaryotes. *Curr Opin Genet Dev.* 1999 Dec;9(6):642–8.
- 782 25. Römling U, Galperin MY. Bacterial cellulose biosynthesis: diversity of operons, subunits,  
783 products, and functions. *Trends Microbiol.* 2015 Sep;23(9):545–57.
- 784 26. Friedman L, Kolter R. Genes involved in matrix formation in *Pseudomonas aeruginosa* PA14  
785 biofilms. *Mol Microbiol.* 2004 Feb 16;51(3):675–90.
- 786 27. Evans LR, Linker A. Production and characterization of the slime polysaccharide of  
787 *Pseudomonas aeruginosa*. *J Bacteriol.* 1973 Nov;116(2):915–24.

- 788 28. Ross P, Weinhouse H, Aloni Y, Michaeli D, Weinberger-Ohana P, Mayer R, et al. Regulation of  
789 cellulose synthesis in *Acetobacter xylinum* by cyclic diguanylic acid. *Nature*. 1987  
790 Jan;325(6101):279–81.
- 791 29. Wang X, Preston JF, Romeo T. The *pgaABCD* locus of *Escherichia coli* promotes the synthesis  
792 of a polysaccharide adhesin required for biofilm formation. *J Bacteriol*. 2004 May;186(9):2724–  
793 34.
- 794 30. Vasseur P, Vallet-Gely I, Soscia C, Genin S, Filloux A. The *pel* genes of the *Pseudomonas*  
795 *aeruginosa* PAK strain are involved at early and late stages of biofilm formation. *Microbiology*.  
796 2005 Mar 1;151(Pt 3):985–97.
- 797 31. Spiers AJ, Bohannon J, Gehrig SM, Rainey PB. Biofilm formation at the air-liquid interface by  
798 the *Pseudomonas fluorescens* SBW25 wrinkly spreader requires an acetylated form of cellulose.  
799 *Mol Microbiol*. 2003 Oct 14;50(1):15–27.
- 800 32. Omelchenko M V, Makarova KS, Wolf YI, Rogozin IB, Koonin E V. Evolution of mosaic  
801 operons by horizontal gene transfer and gene displacement in situ. *Genome Biol*. 2003;4(9):R55.
- 802 33. Koonin E V., Makarova KS, Aravind L. Horizontal Gene Transfer in Prokaryotes: Quantification  
803 and Classification. *Annu Rev Microbiol*. 2001 Oct;55(1):709–42.
- 804 34. Hu S-Q, Gao Y-G, Tajima K, Sunagawa N, Zhou Y, Kawano S, et al. Structure of bacterial  
805 cellulose synthase subunit D octamer with four inner passageways. *Proc Natl Acad Sci U S A*.  
806 2010 Oct 19;107(42):17957–61.
- 807 35. Ji K, Wang W, Zeng B, Chen S, Zhao Q, Chen Y, et al. Bacterial cellulose synthesis mechanism  
808 of facultative anaerobe *Enterobacter* sp. FY-07. *Sci Rep*. 2016 Feb 25;6(1):21863.
- 809 36. Wells JN, Bergendahl LT, Marsh JA. Operon Gene Order Is Optimized for Ordered Protein  
810 Complex Assembly. *Cell Rep*. 2016 Feb 2;14(4):679–85.
- 811 37. Zaslaver A, Mayo A, Ronen M, Alon U. Optimal gene partition into operons correlates with gene  
812 functional order. *Phys Biol*. 2006 Sep 18;3(3):183–9.
- 813 38. Marmont LS, Whitfield GB, Rich JD, Yip P, Giesbrecht LB, Stremick CA, et al. PelA and PelB  
814 proteins form a modification and secretion complex essential for Pel polysaccharide-dependent  
815 biofilm formation in *Pseudomonas aeruginosa*. *J Biol Chem*. 2017 Nov 24;292(47):19411–22.
- 816 39. Cue D, Lei MG, Lee CY. Genetic regulation of the intercellular adhesion locus in staphylococci.  
817 *Front Cell Infect Microbiol*. 2012;2:38.
- 818 40. Purcell EB, Tamayo R. Cyclic diguanylate signaling in Gram-positive bacteria. Shen A, editor.  
819 *FEMS Microbiol Rev*. 2016 Sep;40(5):753–73.

- 820 41. Xu D, Zhang W, Zhang B, Liao C, Shao Y. Characterization of a biofilm-forming *Shigella*  
821 *flexneri* phenotype due to deficiency in Hep biosynthesis. *PeerJ*. 2016 Jul 14;4:e2178.
- 822 42. Echeverz M, García B, Sabalza A, Valle J, Gabaldón T, Solano C, et al. Lack of the PGA  
823 exopolysaccharide in *Salmonella* as an adaptive trait for survival in the host. Casadesús J, editor.  
824 *PLoS Genet*. 2017 May 24;13(5):e1006816.
- 825 43. Jiang K, Sanseverino J, Chauhan A, Lucas S, Copeland A, Lapidus A, et al. Complete genome  
826 sequence of *Thauera aminoaromatica* strain MZ1T. *Stand Genomic Sci*. 2012 Jul 30;6(3):325–  
827 35.
- 828 44. Prombutara P, Allen MS. Flocculation-Related Gene Identification by Whole-Genome  
829 Sequencing of *Thauera aminoaromatica* MZ1T Floc-Defective Mutants. Stams AJM, editor.  
830 *Appl Environ Microbiol*. 2015 Dec 28;82(6):1646–52.
- 831 45. Fata Moradali M, Donati I, Sims IM, Ghods S, Rehm BHA. Alginate Polymerization and  
832 Modification Are Linked in *Pseudomonas aeruginosa*. *MBio*. 2015 May 12;6(3):e00453-15.
- 833 46. Morgan JLW, McNamara JT, Fischer M, Rich J, Chen H-M, Withers SG, et al. Observing  
834 cellulose biosynthesis and membrane translocation in crystallo. *Nature*. 2016 Mar  
835 17;531(7594):329–34.
- 836 47. Morgan JLW, Strumillo J, Zimmer J. Crystallographic snapshot of cellulose synthesis and  
837 membrane translocation. *Nature*. 2013 Jan 10;493(7431):181–6.
- 838 48. Du J, Vepachedu V, Cho SH, Kumar M, Nixon BT. Structure of the Cellulose Synthase Complex  
839 of *Gluconacetobacter hansenii* at 23.4 Å Resolution. Lai H-C, editor. *PLoS One*. 2016 May  
840 23;11(5):e0155886.
- 841 49. Krasteva PV, Bernal-Bayard J, Travier L, Martin FA, Kaminski P-A, Karimova G, et al. Insights  
842 into the structure and assembly of a bacterial cellulose secretion system. *Nat Commun*. 2017 Dec  
843 12;8(1):2065.
- 844 50. Heilmann C, Schweitzer O, Gerke C, Vanittanakom N, Mack D, Götz F. Molecular basis of  
845 intercellular adhesion in the biofilm-forming *Staphylococcus epidermidis*. *Mol Microbiol*. 1996  
846 Jun;20(5):1083–91.
- 847 51. Skurnik D, Cywes-Bentley C, Pier GB. The exceptionally broad-based potential of active and  
848 passive vaccination targeting the conserved microbial surface polysaccharide PNAG. *Expert Rev*  
849 *Vaccines*. 2016;15(8):1041–53.
- 850 52. Vuong C, Kocianova S, Voyich JM, Yao Y, Fischer ER, DeLeo FR, et al. A crucial role for  
851 exopolysaccharide modification in bacterial biofilm formation, immune evasion, and virulence. *J*  
852 *Biol Chem*. 2004 Dec 24;279(52):54881–6.

- 853 53. Atkin KE, MacDonald SJ, Brentnall AS, Potts JR, Thomas GH. A different path: Revealing the  
854 function of staphylococcal proteins in biofilm formation. FEBS Lett. 2014 May  
855 21;588(10):1869–72.
- 856 54. Itoh Y, Rice JD, Goller C, Pannuri A, Taylor J, Meisner J, et al. Roles of pgaABCD genes in  
857 synthesis, modification, and export of the Escherichia coli biofilm adhesin poly-beta-1,6-N-  
858 acetyl-D-glucosamine. J Bacteriol. 2008 May 15;190(10):3670–80.
- 859 55. Gerke C, Kraft A, Süßmuth R, Schweitzer O, Götz F. Characterization of the N -  
860 Acetylglucosaminyltransferase Activity Involved in the Biosynthesis of the *Staphylococcus*  
861 *epidermidis* Polysaccharide Intercellular Adhesin. J Biol Chem. 1998 Jul 17;273(29):18586–93.
- 862 56. Steiner S, Lori C, Boehm A, Jenal U. Allosteric activation of exopolysaccharide synthesis  
863 through cyclic di-GMP-stimulated protein-protein interaction. EMBO J. 2013 Feb 6;32(3):354–  
864 68.
- 865 57. Holland LM, O'Donnell ST, Ryjenkov DA, Gomelsky L, Slater SR, Fey PD, et al. A  
866 staphylococcal GGDEF domain protein regulates biofilm formation independently of cyclic  
867 dimeric GMP. J Bacteriol. 2008 Aug 1;190(15):5178–89.
- 868 58. Whitfield GB, Marmont LS, Howell PL. Enzymatic modifications of exopolysaccharides  
869 enhance bacterial persistence. Front Microbiol. 2015 May 15;6:471.
- 870 59. Little DJ, Pfoh R, Le Mauff F, Bamford NC, Notte C, Baker P, et al. PgaB orthologues contain a  
871 glycoside hydrolase domain that cleaves deacetylated poly-β(1,6)-N-acetylglucosamine and can  
872 disrupt bacterial biofilms. Skurnik D, editor. PLOS Pathog. 2018 Apr 23;14(4):e1006998.
- 873 60. Wang Y, Andole Pannuri A, Ni D, Zhou H, Cao X, Lu X, et al. Structural Basis for Translocation  
874 of a Biofilm-supporting Exopolysaccharide across the Bacterial Outer Membrane. J Biol Chem.  
875 2016 May 6;291(19):10046–57.
- 876 61. Little DJ, Poloczek J, Whitney JC, Robinson H, Nitz M, Howell PL. The structure- and metal-  
877 dependent activity of Escherichia coli PgaB provides insight into the partial de-N-acetylation of  
878 poly-β-1,6-N-acetyl-D-glucosamine. J Biol Chem. 2012 Sep 7;287(37):31126–37.
- 879 62. Little DJ, Bamford NC, Pokrovskaya V, Robinson H, Nitz M, Howell PL. Structural basis for the  
880 De-N-acetylation of Poly-β-1,6-N-acetyl-D-glucosamine in Gram-positive bacteria. J Biol  
881 Chem. 2014 Dec 26;289(52):35907–17.
- 882 63. Tocheva EI, Ortega DR, Jensen GJ. Sporulation, bacterial cell envelopes and the origin of life.  
883 Nat Rev Microbiol. 2016 Aug 27;14(8):535–42.
- 884 64. Finn RD, Bateman A, Clements J, Coghill P, Eberhardt RY, Eddy SR, et al. Pfam: the protein  
885 families database. Nucleic Acids Res. 2014 Jan;42(Database issue):D222-30.

- 886 65. Tatusov RL, Galperin MY, Natale DA, Koonin E V. The COG database: a tool for genome-scale  
887 analysis of protein functions and evolution. *Nucleic Acids Res.* 2000 Jan 1;28(1):33–6.
- 888 66. Li H, Coghlan A, Ruan J, Coin LJ, Hériché J-K, Osmotherly L, et al. TreeFam: a curated  
889 database of phylogenetic trees of animal gene families. *Nucleic Acids Res.* 2006 Jan  
890 1;34(Database issue):D572-80.
- 891 67. Gori K, Suchan T, Alvarez N, Goldman N, Dessimoz C. Clustering Genes of Common  
892 Evolutionary History. *Mol Biol Evol.* 2016 Jun;33(6):1590–605.
- 893 68. Eisen JA, Sweder KS, Hanawalt PC. Evolution of the SNF2 family of proteins: subfamilies with  
894 distinct sequences and functions. *Nucleic Acids Res.* 1995 Jul 25;23(14):2715–23.
- 895 69. Wasmuth JD, Pszeny V, Haile S, Jansen EM, Gast AT, Sher A, et al. Integrated bioinformatic  
896 and targeted deletion analyses of the SRS gene superfamily identify SRS29C as a negative  
897 regulator of *Toxoplasma* virulence. *MBio.* 2012 Nov 13;3(6):e00321-12-e00321-12.
- 898 70. Huynen M, Snel B, Lathe W, Bork P. Predicting protein function by genomic context:  
899 quantitative evaluation and qualitative inferences. *Genome Res.* 2000 Aug;10(8):1204–10.
- 900 71. Fang G, Rocha EPC, Danchin A. Persistence drives gene clustering in bacterial genomes. *BMC*  
901 *Genomics.* 2008 Jan 7;9(1):4.
- 902 72. Junier I, Rivoire O. Conserved Units of Co-Expression in Bacterial Genomes: An Evolutionary  
903 Insight into Transcriptional Regulation. Moreno-Hagelsieb G, editor. *PLoS One.* 2016 May  
904 19;11(5):e0155740.
- 905 73. Ausmees N, Jonsson H, Høglund S, Ljunggren H, Lindberg M. Structural and putative  
906 regulatory genes involved in cellulose synthesis in *Rhizobium leguminosarum* bv. *trifolii*.  
907 *Microbiology.* 1999 May 1;145(5):1253–62.
- 908 74. Ahmad I, Rouf SF, Sun L, Cimdins A, Shafeeq S, Le Guyon S, et al. BcsZ inhibits biofilm  
909 phenotypes and promotes virulence by blocking cellulose production in *Salmonella enterica*  
910 serovar Typhimurium. *Microb Cell Fact.* 2016 Oct 19;15(1):177.
- 911 75. Sajadi E, Babaipour V, Deldar AA, Yakhchali B, Fatemi SS-A. Enhancement of crystallinity of  
912 cellulose produced by *Escherichia coli* through heterologous expression of *bcsD* gene from  
913 *Gluconacetobacter xylinus*. *Biotechnol Lett.* 2017 Sep 1;39(9):1395–401.
- 914 76. Sandegren L, Andersson DI. Bacterial gene amplification: implications for the evolution of  
915 antibiotic resistance. *Nat Rev Microbiol.* 2009 Aug;7(8):578–88.
- 916 77. Jahn CE, Selimi DA, Barak JD, Charkowski AO. The *Dickeya dadantii* biofilm matrix consists  
917 of cellulose nanofibres, and is an emergent property dependent upon the type III secretion  
918 system and the cellulose synthesis operon. *Microbiology.* 2011 Oct 1;157(Pt 10):2733–44.

- 919 78. MacKenzie KD, Palmer MB, Köster WL, White AP. Examining the Link between Biofilm  
920 Formation and the Ability of Pathogenic Salmonella Strains to Colonize Multiple Host Species.  
921 Front Vet Sci. 2017 Aug 25;4:138.
- 922 79. Tatusova T, Ciufo S, Fedorov B, O'Neill K, Tolstoy I. RefSeq microbial genomes database: new  
923 representation and annotation strategy. Nucleic Acids Res. 2015 Apr 20;43(7):3872–3872.
- 924 80. Edgar RC. MUSCLE: multiple sequence alignment with high accuracy and high throughput.  
925 Nucleic Acids Res. 2004 Mar 8;32(5):1792–7.
- 926 81. Eddy SR. Accelerated Profile HMM Searches. Pearson WR, editor. PLoS Comput Biol. 2011  
927 Oct 20;7(10):e1002195.
- 928 82. Fu L, Niu B, Zhu Z, Wu S, Li W. CD-HIT: accelerated for clustering the next-generation  
929 sequencing data. Bioinformatics. 2012 Dec 1;28(23):3150–2.
- 930 83. Capella-Gutiérrez S, Silla-Martínez JM, Gabaldón T. trimAl: a tool for automated alignment  
931 trimming in large-scale phylogenetic analyses. Bioinformatics. 2009 Aug 1;25(15):1972–3.
- 932 84. Guindon S, Delsuc F, Dufayard J-F, Gascuel O. Estimating Maximum Likelihood Phylogenies  
933 with PhyML. In: Methods in molecular biology (Clifton, NJ). 2009. p. 113–37.
- 934 85. Rousseeuw PJ. Silhouettes: A graphical aid to the interpretation and validation of cluster  
935 analysis. J Comput Appl Math. 1987 Nov 1;20:53–65.
- 936 86. Dunn JC. A Fuzzy Relative of the ISODATA Process and Its Use in Detecting Compact Well-  
937 Separated Clusters. J Cybern. 1973 Jan;3(3):32–57.
- 938 87. Killcoyne S, Carter GW, Smith J, Boyle J. Cytoscape: a community-based framework for  
939 network modeling. Methods Mol Biol. 2009;563:219–39.
- 940 88. Ondov BD, Bergman NH, Phillippy AM. Interactive metagenomic visualization in a Web  
941 browser. BMC Bioinformatics. 2011 Sep 30;12(1):385.
- 942 89. Pettersen EF, Goddard TD, Huang CC, Couch GS, Greenblatt DM, Meng EC, et al. UCSF  
943 Chimera--a visualization system for exploratory research and analysis. J Comput Chem. 2004  
944 Oct;25(13):1605–12.  
945

## 946 FIGURE LEGENDS

947 **Figure 1. Summary of Predicted Bacterial EPS Operons.** (A) Number of predicted EPS operons are  
948 summarized by bacterial lifestyle (pathogen, non-pathogen, unknown) and corresponding niche (host-  
949 associated, environmental/other, unknown). (B) Evolutionary events associated with EPS operons:  
950 Locus loss (core EPS operon loci not detected by HMM searches); Locus rearrangement (EPS operons  
951 featuring locus orderings that differ from the canonical operon for that type – **Supplemental Table 1**);  
952 Locus duplication (defined by two loci possessing a significant match to the same EPS HMM within  
953 the same operon); Operon duplication, defined as a genome encoding two copies of the same type of  
954 EPS system, separated by greater than 10 Kbp; Locus fusion, loci possessing significant matches to  
955 multiple EPS HMMs. (C) Phylogenetic distribution of EPS operons visualized by Krona(88). (D)  
956 Patterns of EPS operon co-occurrences indicating the frequency of specific operon combinations within  
957 a single genome.

958  
959 **Figure 2. Clustering of EPS Loci.** (A) Schematic illustrating the process of scanning through a  
960 phylogenetic tree and identifying sets of clusters associated at different evolutionary distance cutoffs.  
961 Here evolutionary distance is defined as the number of expected amino-acid substitutions normalized  
962 over the multiple sequence alignment length. To identify optimal patterns of clusters, we examined  
963 three scoring schemes (Q1, Q2 and Q3). Q1 is defined as the sum of the average silhouette score for all  
964 clusters:  $\mu(s(i))$ , and the Dunn index (DI). Q2 is defined as the sum of the proportion of sequences  
965 identified in clusters ( $\Sigma c/\Sigma m$ ),  $\mu(s(i))$  and DI. Q3 is defined as the product of  $\Sigma c/\Sigma m$  and the sum of  
966  $\mu(s(i))$  and DI. For the family of genes related to the *bcsA* locus, each scoring scheme identifies a  
967 different optimal evolutionary distance cutoff resulting in defining different sets of clusters. (B) Graph  
968 illustrating the average number of sequence clusters predicted (sum of # of clusters over all loci / total  
969 number of EPS loci) for each type of EPS operon. (C) Graph illustrating the average evolutionary  
970 distance of EPS loci cluster members with other members of the same cluster. (D) Cellulose operon  
971 networks generated using the different types of scoring scheme cutoffs used in (A). For each network,  
972 nodes indicate clusters of sequences representing individual cellulose loci, edges indicate genome  
973 proximity between the two linked loci. Nodes are organized into sets of four, ordered from top to  
974 bottom as *bcsA*, *bcsB*, *bcsZ* and *bcsC*. Node size indicates the number of family members associated  
975 with that locus cluster. Node colour indicates phylogenetic representation of cluster members. Edge  
976 colour indicates genomic proximity of phylogenetic clusters. At higher evolutionary distances (as  
977 defined by Q2 and Q3), networks yield more informative patterns of evolutionary relationships as  
978 illustrated by larger clusters of loci featuring larger number of interconnections.

979  
980 **Figure 3. Genomic-Proximity Network of Phylogenetically Clustered Cellulose Operons.**  
981 Phylogenetically clustered operon loci are arranged vertically with respect to the canonical ordering of  
982 the cellulose operon (indicated by grey side bar). Inset boxes depict selected examples of cellulose  
983 operon clades, illustrating how the network can inform on evolutionary events: (i) Rearrangement of  
984 *bcsA* among betaproteobacteria – Here, *bcsA* appears in closer proximity to *bcsC* than to *bcsB* or *bcsZ*  
985 (as indicated by a cyan coloured edge for the former and a grey coloured edge for the latter). Further  
986 the cyan edge indicates a relatively large intergenic distance, suggesting a locus gain between *bcsA* and  
987 *bcsC*, confirmed upon inspection of the genome of *Burkholderia cenocepacia*; (ii) Rearrangement and  
988 gene fusions in alphaproteobacterial – in examples 1 and 2, the red edge indicates operons in which  
989 *bcsB* is closer to *bcsC* than *bcsZ*, the cyan edges suggest that *bcsZ* is present, but appears after *bcsC*  
990 (example 1), while in other operons, *bcsZ* appears missing (example 2). Detailed inspection of example

991 operons (e.g. *Zymomonas* spp.) reveals the fusion of the periplasmic hydrolase and outer membrane  
992 pore (BcsZC), in example 3, the apparent loss of *bcsB* in another *Zymomonas* spp. is explained by a  
993 fusion between the inner membrane cellulose synthase complex subunits (BcsAB); (iii) Loss of outer  
994 membrane pore, BcsC, and divergence of the inner membrane cellulose co-polymerase, BcsB, in  
995 alphaproteobacteria – in these taxa, BcsB appears highly divergent (as indicated by their identification  
996 through more sensitive HMM searches – grey nodes) and no BcsC was identified (confirmed through  
997 inspection of representative operons). Further interpretation of the operons identified in the box  
998 denoted with a ‘\*’, which represent HGT events, are illustrated in Figure 4. Node size indicates the  
999 relative number of sequences per phylogenetic cluster; node colouring represents the taxonomic  
1000 distribution of loci for a given cluster; edges connect clusters which co-occur in the same genome(s);  
1001 edge colour indicates the genomic-proximity of loci clusters. The network was visualized using  
1002 Cytoscape 3.5.1(87).

1003  
1004 **Figure 4. Horizontal Gene Transfer of Cellulose Operons Identified From Analysis of the**  
1005 **Genomic-Proximity Network.** Here we show how a subgraph (A) from the global cellulose EPS  
1006 operon genomic-proximity network (**Figure 3(\*)**), may be interpreted to reveal HGT events involving  
1007 two distinct gamma proteobacterial operon clades, A (canonical *bcsABZC*) and B (*bcsABC-Z*). (B)  
1008 Examples of operons in two species which possess either a single A1 (“canonical”) or B1  
1009 (rearrangement of *bcsZC*) operon clade. (C) Example from *Klebsiella pneumoniae* in which a single  
1010 genome contains both A1 and B1 operons, indicating a HGT event. (D) Example from *Proteus*  
1011 *mirabilis* featuring two copies (designated A2 and B2 respectively) of the cellulose EPS operon, which  
1012 appear to be divergent forms of A1 and B1: A2 features an apparent loss of the *bcsZ* locus from A1; B2  
1013 features a locus gain between *bcsC* and *bcsZ* from B1. Example from *Enterobacter* spp. in which the  
1014 genome carries three copies of the cellulose EPS operon. In addition to clade A1 and B1 operon  
1015 arrangements, a further operon (designated B3) appears in which *bcsB* has diverged from a B2 clade  
1016 operon. Arrows within the network schematics depict the order of loci within the operon and are  
1017 coloured according to intergenic distance: red < 100bp; cyan >100bp & <5 Kbp; grey >5Kbp.

1018  
1019 **Figure 5. Genomic-Proximity Network of Phylogenetically Clustered *pel* Operons.**  
1020 Phylogenetically clustered operon loci are arranged vertically with respect to the canonical ordering of  
1021 the *pel* operon (indicated by grey side bar). As for Figure 4, inset boxes depict selected examples of *pel*  
1022 operon clades, illustrating how the network can inform on evolutionary events: (i) Canonical  
1023 organization of the *pel* operon, as defined in the *Pseudomonas aeruginosa* genome.; (ii) Duplication of  
1024 the *pel* operon in *Nitrospira multififormis* with subsequent evolution through locus gain and loss, as  
1025 well as rearrangement of *pelA*; (iii) *pelB* fission, locus gain and rearrangement in aquatic thermophilic  
1026 species; (iv) A potentially novel duplicated *pel* operon identified in *Leptospirillum ferrooxidans*  
1027 comprised of divergent *pelA* and *pelF* loci; (v) *pel* operons identified in Gram-positive species  
1028 including divergent *pelD* loci involved in regulation through cyclic di-GMP. Node size indicates the  
1029 relative number of sequences per phylogenetic cluster; node border colouring represents the taxonomic  
1030 distribution of loci for a given cluster; grey filled nodes indicate loci predicted by iterative HMM  
1031 searches; edges connect clusters which co-occur in the same genome(s); edge colour indicates the  
1032 genomic-proximity of loci clusters. The network was visualized using Cytoscape 3.5.1(87).

1033  
1034  
1035 **Supplemental Figure 1. Lifestyle and Niche Distribution of Predicted EPS Operons.** The number  
1036 of bacterial genomes with different combinations of predicted EPS operons, further represented with  
1037 their distribution (% bacterial genomes) across different lifestyles and environmental niches. Asterisks



1038 indicate statistically significant enrichment of single or multiple EPS operon combinations among  
1039 pathogenic (red asterisks) or non-pathogenic bacteria (green asterisks) (one sided T-test  $p \leq 0.05$  with  
1040 Bonferroni correction).

1041  
1042 **Supplemental Figure 2. Species Diversity of Predicted Synthase Dependent EPS Systems**  
1043 **(Shannon Diversity).**

1044  
1045 **Supplemental Figure 3. Identification of Gram-positive *pel* Operons.** (A) Subnetwork depicting  
1046 Gram-positive *pel* operon clades with varying numbers of loci identified as significant matches (e-  
1047 value  $< 1e-5$ ) in first-pass (unfilled nodes) and iterative HMM searches (grey nodes). Selected  
1048 examples shown: (i) *PelA*-*PelFG* sequences identified by first-pass HMM hits; (i.b) Iterative HMM  
1049 searches identifying additional *pelA* loci in *B. cereus* ATCC 10987, a known pellicle producing Gram-  
1050 positive; (ii) Additional *pelD* loci identified by iterative HMM; (iii) Gram-positive *pel* operons with  
1051 only *pelF* and *pelG* loci identified. (B) Operon organizations of selected examples of Gram-positive *pel*  
1052 operons (corresponding highlighted in panel A) with additional highly divergent loci identified (red  
1053 boxes: hits above HMM e-value threshold of  $1e-5$ ).

1054  
1055 **Supplemental Figure 4. Genomic-Proximity Network of Phylogenetically Clustered *pga* Operons.**  
1056 Phylogenetically clustered operon loci are arranged according to the canonical *pga* operon ordering  
1057 indicated by the grey sidebar. Inset boxes depict selected examples of *pga* operon clades distinguished  
1058 by evolutionary events: i) Divergence of *pgaD* corresponding to related enterobacterial species  
1059 including pathogen-specific losses of *pgaA* and *pgaB* loci critical for PNAG export; ii) Operon  
1060 duplications occurring in aquatic niche dwelling bacteria, including a partial duplication of the *pga*  
1061 operon specific to the opportunistic pathogen *Acinetobacter baumannii* spp. and a whole operon  
1062 duplication identified in *Methylovora versatilis*; iii) A unique *pga* operon organization among  
1063 environmental bacteria lacking a *pgaD* locus; iv) Gram-positive *ica* operons (annotated by their HMM  
1064 hits to corresponding Gram-negative *pga* loci) with divergent *icaB* loci, resulting from novel domain  
1065 acquisitions (iv.b and iv.c); v) A novel *pga* derived operon resulting from multiple tandem duplications  
1066 of the *pgaC* polysaccharide synthase and lack of detectable *pgaA* outer membrane pore and *pgaD*.  
1067 Node size indicates the relative number of sequences per phylogenetic cluster; node colouring  
1068 represents the taxonomic distribution of loci for a given cluster; edges connect clusters which co-occur  
1069 in the same genome(s); edge colour indicates the genomic-proximity of loci clusters. The network was  
1070 visualized using Cytoscape 3.5.1(87).

1071  
1072 **Supplemental Figure 5. Genomic-Proximity Network of Phylogenetically Clustered Alginate**  
1073 **Operons.** Phylogenetically clustered operon loci are arranged according to the canonical alginate  
1074 operon ordering indicated by the grey sidebar. Inset boxes depict selected examples of alginate operon  
1075 clades distinguished by evolutionary events: Inset boxes depict selected examples of alginate operon  
1076 clades distinguished by evolutionary events: i) Canonical alginate operon organization with a partial  
1077 operon duplication event identified in *Pseudomonas resinovorans* 136 resulting in the loss of alginate  
1078 acetylation machinery (ib – indicated by A\*); ii) A distinct alginate operon clade (ii.a-c) identified by  
1079 rearrangement of acetylation machinery (indicated by B\*) as well as HGT events with canonical  
1080 alginate operon possessing species; iii) Atypical alginate operons involving loss of outer membrane  
1081 transport loci or portions of acetylation machinery in deep sea dwelling bacteria. Node size indicates  
1082 the relative number of sequences per phylogenetic cluster; node colouring represents the taxonomic  
1083 distribution of loci for a given cluster; edges connect clusters which co-occur in the same genome(s);

1084 edge colour indicates the genomic-proximity of loci clusters. The network was visualized using  
1085 Cytoscape 3.5.1(87).

1086

1087 **Supplemental Figure 6. Genomic-Proximity Network of Phylogenetically Clustered Acetylated-**  
1088 **Cellulose Operons.** Phylogenetically clustered operon loci are arranged according to the canonical  
1089 acetylated cellulose operon ordering indicated by the grey sidebar. Inset panels identify three  
1090 acetylated-cellulose operons identified in *Pseudomonas* spp. (i) and a single *Bordetella avium* genome  
1091 possessing a duplicated polysaccharide co-polymerase *wssC* locus (ii - indicated by red asterisk). Node  
1092 size indicates the relative number of sequences per phylogenetic cluster; node colouring represents the  
1093 taxonomic distribution of loci for a given cluster; edges connect clusters which co-occur in the same  
1094 genome(s); edge colour indicates the genomic-proximity of loci clusters. The network was visualized  
1095 using Cytoscape 3.5.1(87).

1096

1097 **Supplemental Figure 7. Phylogenetic Sequence Clustering Reflect Differences in Structural**  
1098 **Conservation Between Cellulose Synthase Complex Subunits BcsA and BcsB.** Top panel -  
1099 Sequence conservation was mapped onto the cellulose synthase complex, BcsA-BcsB (4HG6 -  
1100 *Rhodobacter sphaeroides* ATCC 17025) comprising sequences from eight species representing distinct  
1101 cellulose operon clades (**Figure 4(i)-(iv)**). Lower panels - structural and multiple sequence alignments  
1102 indicate a high degree of conservation corresponding to BcsA glycosyl hydrolase catalytic core domain  
1103 and regions of the cellulose translocation channel (i) and UDP binding sites of the BcsA PilZ domain  
1104 (ii). In Contrast, low overall sequence conservation is found among the carbohydrate binding and  
1105 ferredoxin domains (CBD1-2, and FD1-2) of BcsB sequences, except the highly conserved cellulose  
1106 binding site residing in CBD-2 (iii). The translocated cellulose polymer is indicated in green. BcsA  
1107 domains identified using PFAM predictions for the *R. sphaeroides* reference sequence, BcsB domains  
1108 were assigned according to (45). Multiple sequence alignment was visualized generated using  
1109 Geneious 10.2.2 (<http://www.geneious.com>), protein structure was visualized using Chimera  
1110 1.11.2(89).

1111

1112 **Supplemental Figure 8. Phylogenetic Clustering Reveals Structural Evolution of PNAG PgaB**  
1113 **Periplasmic Modifying Enzyme Distinguishing Gram-Negative and Gram-Positive PNAG Operon**  
1114 **Clades.** A) - Multiple sequence alignment of representative sequences comprising all PgaB  
1115 phylogenetic clusters. Global sequence conservation compared against *E. coli* MG1655 K12 PgaB,  
1116 phylogenetic cluster PgaB\_G1, indicates presence of polysaccharide deacetylase domain (blue box) but  
1117 an absence of glycosyl-hydrolase domain in non-PgaB\_G1 sequences. Red arrows indicate  
1118 phylogenetic group specific N-terminal domain fusions predicted by PFAM searches; C-terminal  
1119 domain fusions identified (red box) as putative hydrolase domains from BLAST searches. B) - A close  
1120 up view of sequence conservation of PgaB polysaccharide deacetylase domains with indel events  
1121 highlighted: green boxes indicate insertions identified in non PgaB\_G1 sequences; teal boxes indicate  
1122 insertions in PgaB\_G1 sequence residing in the C-terminal alpha-helix cap (yellow box). C - Crystal  
1123 structure of *E. coli* PgaB (4F9D) indicating conservation of the deacetylase domain catalytic core. D -  
1124 Deacetylase domain with indel regions indicated according to the colour scheme described for panel B.  
1125 E - C-terminal alpha helical cap region of the PgaB deacetylase domain indicating insertions of the  
1126 PgaB\_G1 region that are spatially proximal to an N-terminal region of the hydrolase domain (light  
1127 purple); comparison of the same regions with PgaB\_G1 sequence conservation indicated. Multiple  
1128 sequence alignment was visualized generated using Geneious 10.2.2 (<http://www.geneious.com>),  
1129 protein structure was visualized using Chimera 1.11.2(89) .

(A) Operon Summary

bioRxiv preprint doi: <https://doi.org/10.1101/769745>; this version posted September 14, 2019. The copyright holder for this preprint (which was not certified by peer review) is the author/funder, who has granted bioRxiv a license to display the preprint in perpetuity. It is made available under aCC-BY 4.0 International license.

|                            | Acetylated-Cellulose | Alginate | Cellulose | Pel | PNAG |
|----------------------------|----------------------|----------|-----------|-----|------|
| Total Species Genomes      | 4                    | 60       | 367       | 140 | 288  |
| Lifestyle: Non-Pathogen    | 2                    | 39       | 187       | 84  | 124  |
| Lifestyle: Pathogen        | 2                    | 21       | 161       | 36  | 161  |
| Lifestyle: Unknown         | 0                    | 0        | 19        | 20  | 3    |
| Niche: Host-Associated     | 3                    | 32       | 240       | 57  | 194  |
| Niche: Environmental/Other | 1                    | 28       | 108       | 63  | 91   |
| Niche: Unknown             | 0                    | 0        | 19        | 20  | 3    |

(B) Evolutionary Events

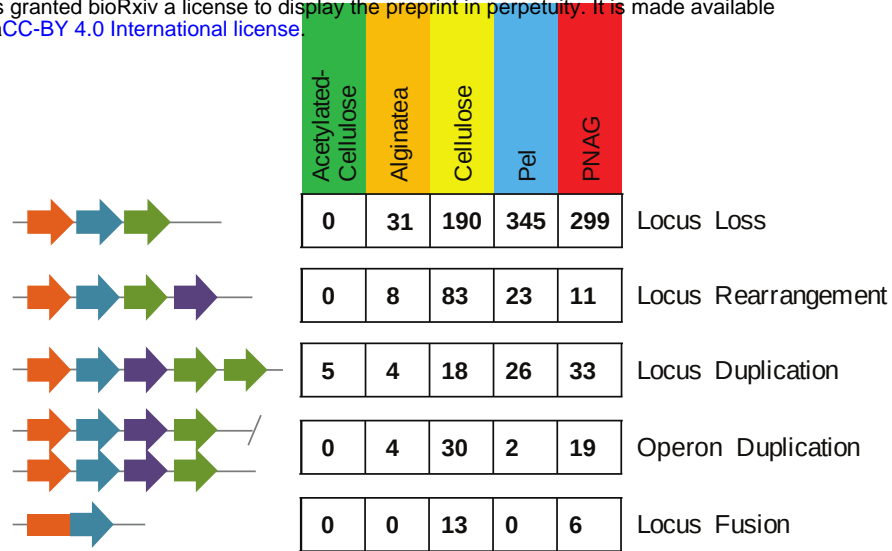

(C) Phylogenetic breakdown

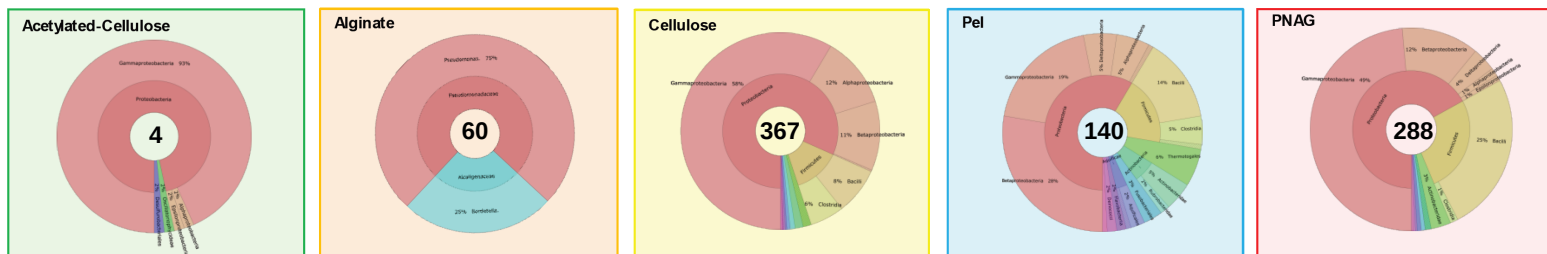

Dominant Phyla (>= 5% of Genomes)

Proteobacteria Firmicutes Actinobacteria

(D) Co-occurring Operons

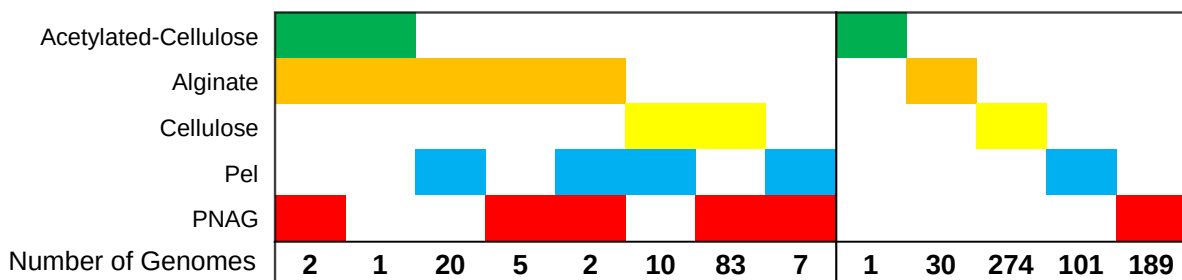

### (A) Overview of Clustering

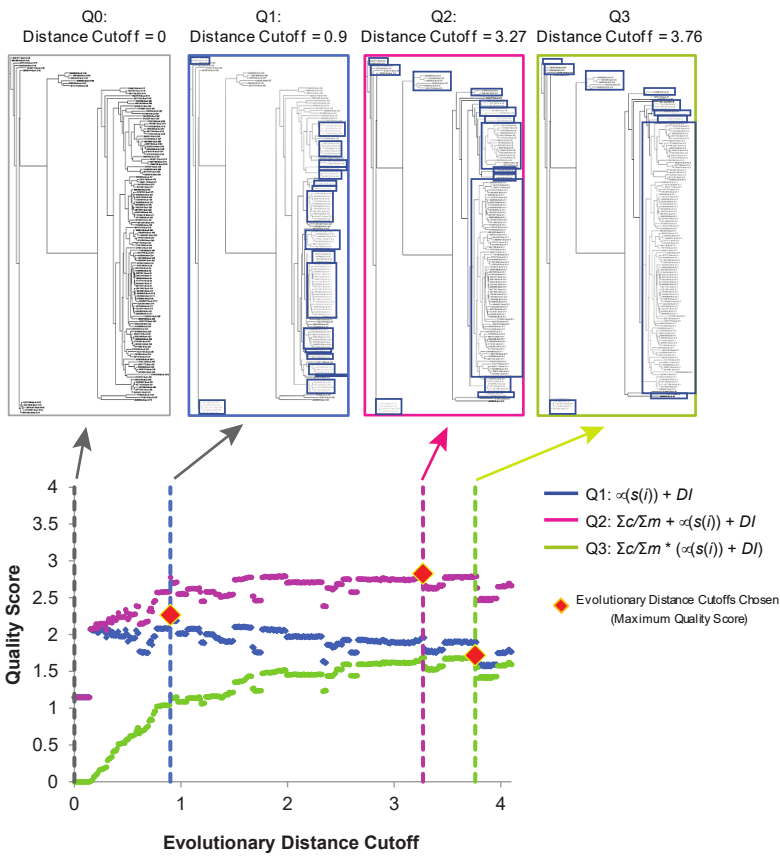

### (B) Predicted Clusters by EPS type

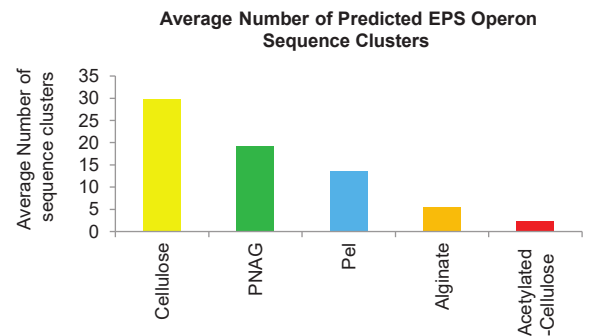

### (C) Cluster Diversity by EPS Locus

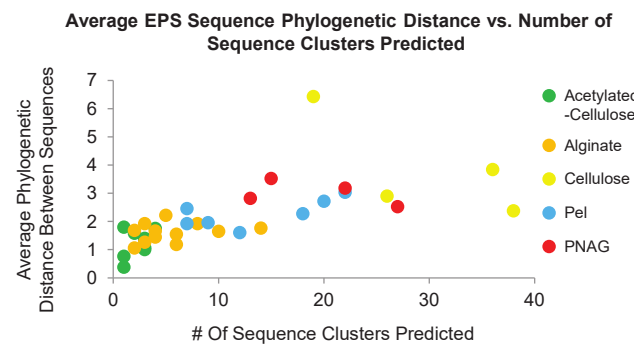

### (D) Operon Networks Generated Using Different Quality Scores

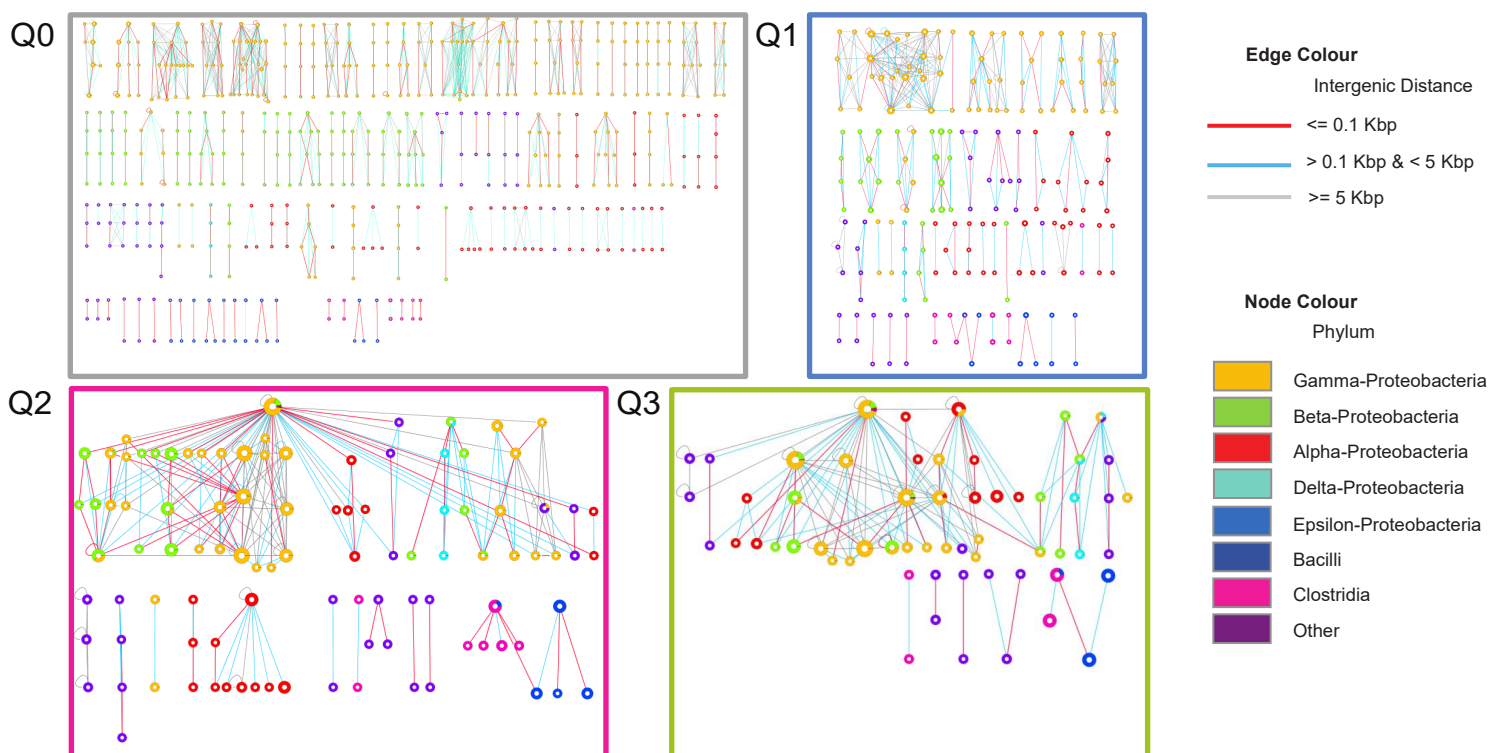

(i) bioRxiv preprint doi: <https://doi.org/10.1101/769745>; this version posted September 14, 2019. The copyright holder for this preprint (which was not certified by peer review) is the author/funder, who has granted bioRxiv a license to display the preprint in perpetuity. It is made available under aCC-BY 4.0 International license.

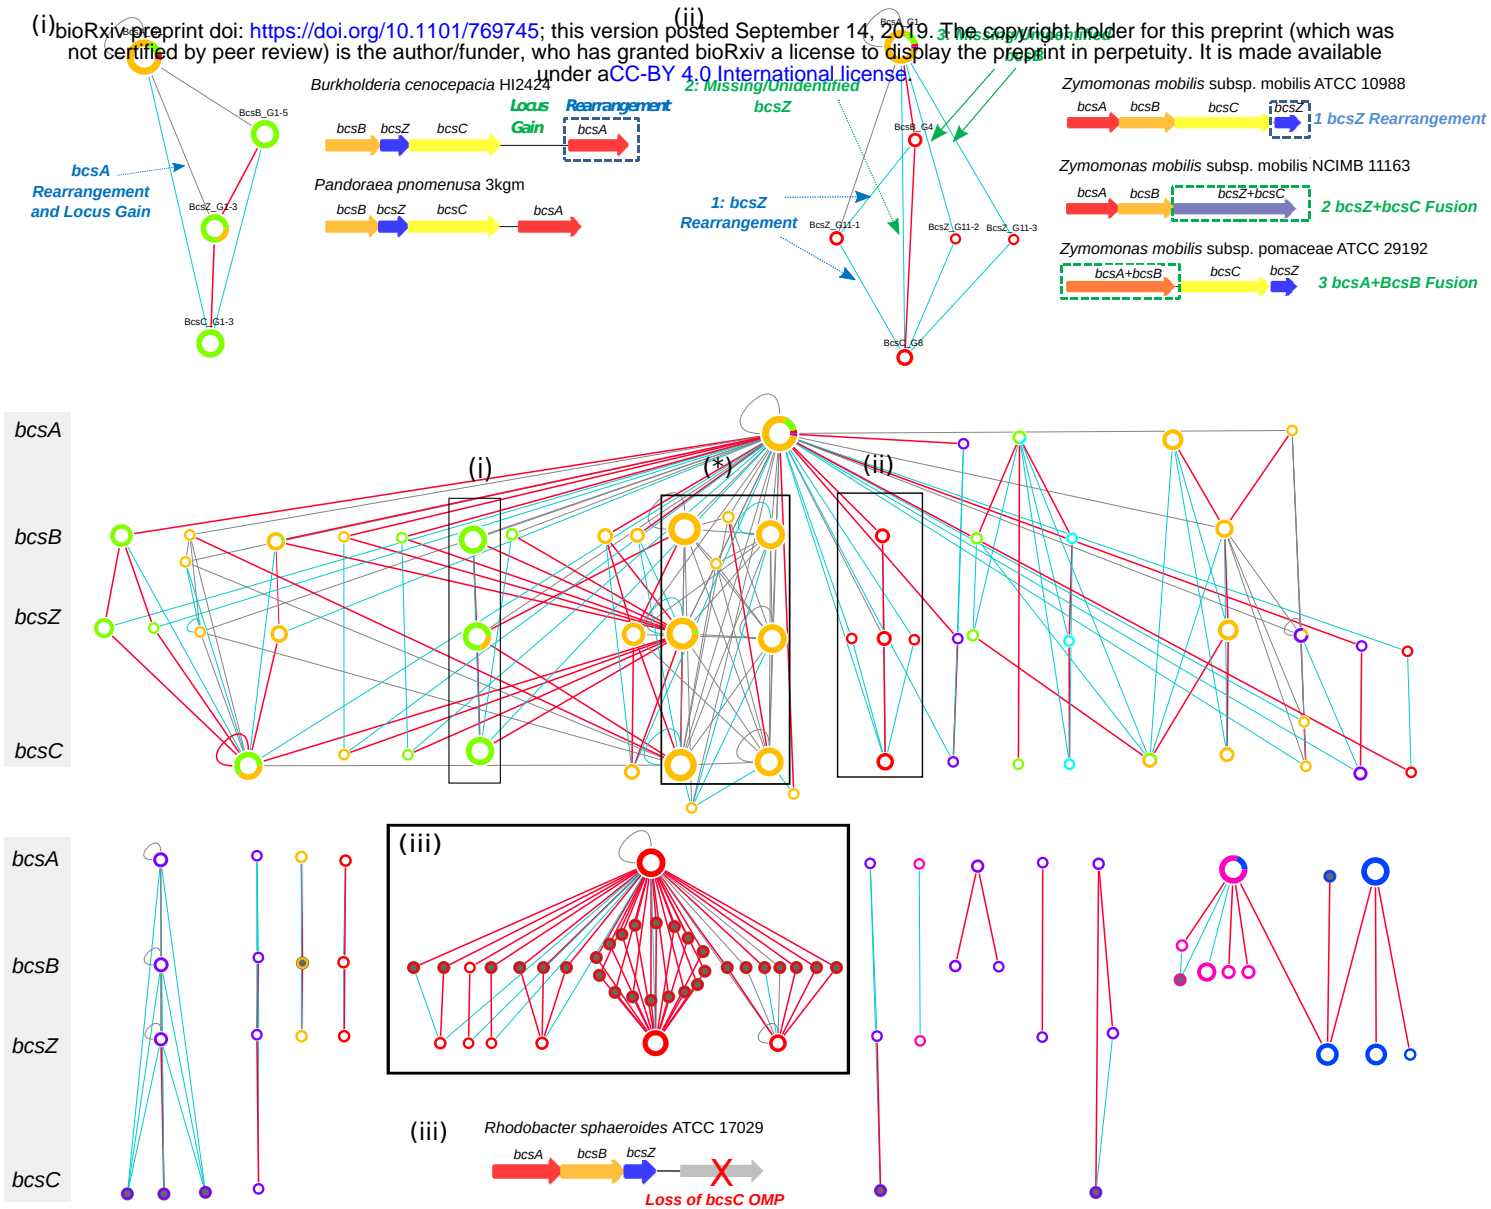

#### Operon Arrows

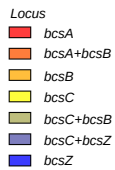

#### Intergenic Distance

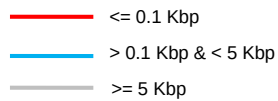

#### # Of Sequences

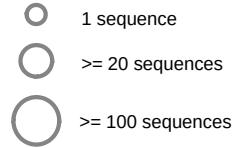

#### Taxa

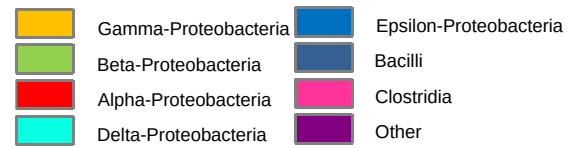

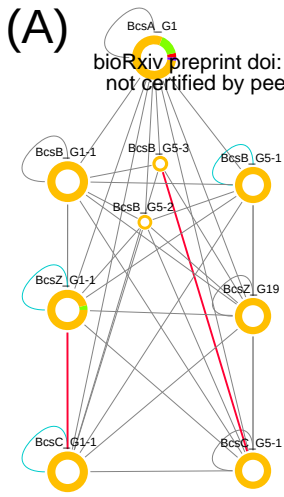

(B) Non-Duplicated Operon Clades

bioRxiv preprint doi: <https://doi.org/10.1101/769745>; this version posted September 14, 2019. The copyright holder for this preprint (which was not certified by peer review) is the author/funder, who has granted bioRxiv a license to display the preprint in perpetuity. It is made available under aCC-BY 4.0 International license.

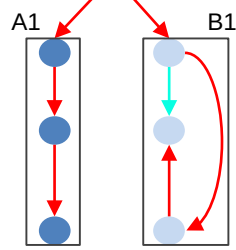

A1: "Canonical" Cellulose Operon  
 B1: Divergent *bcsBZC* + Operon Rearrangement of *bcsZC*

*Salmonella enterica* subsp. *enterica* serovar Typhimurium str. LT2

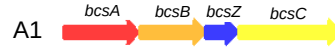

*Dickeya dadantii* 3937

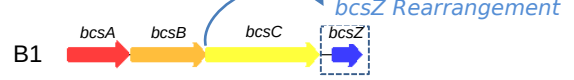

(C) Duplication / HGT of Operon Clades

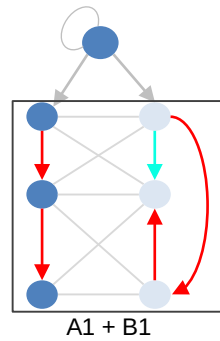

A1

*Klebsiella pneumoniae* 342

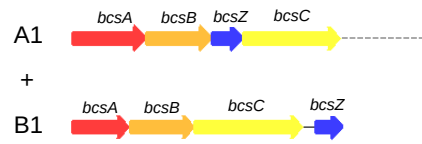

(D) Duplication / HGT of Operon Clades + Divergence

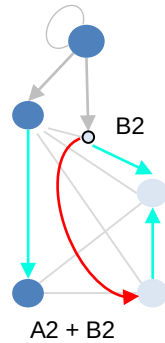

A2 + B2

*Proteus mirabilis* BB2000

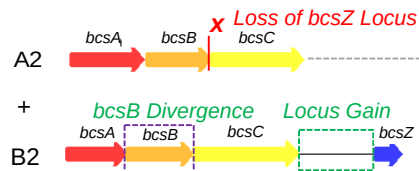

A2: Loss of *bcsZ*  
 B2: Divergent B1 + Locus Gain Between *bcsC* and *bcsZ*

(E) Two HGT Events of Operon Clades + Divergence

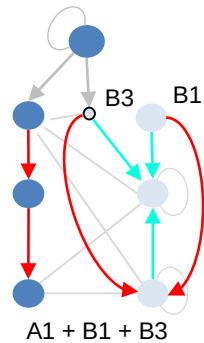

B3: *bcsB* Divergence of B2 Operon

*Enterobacter* sp. R4-368

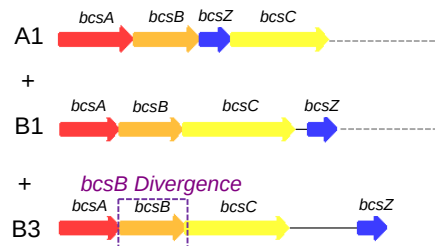

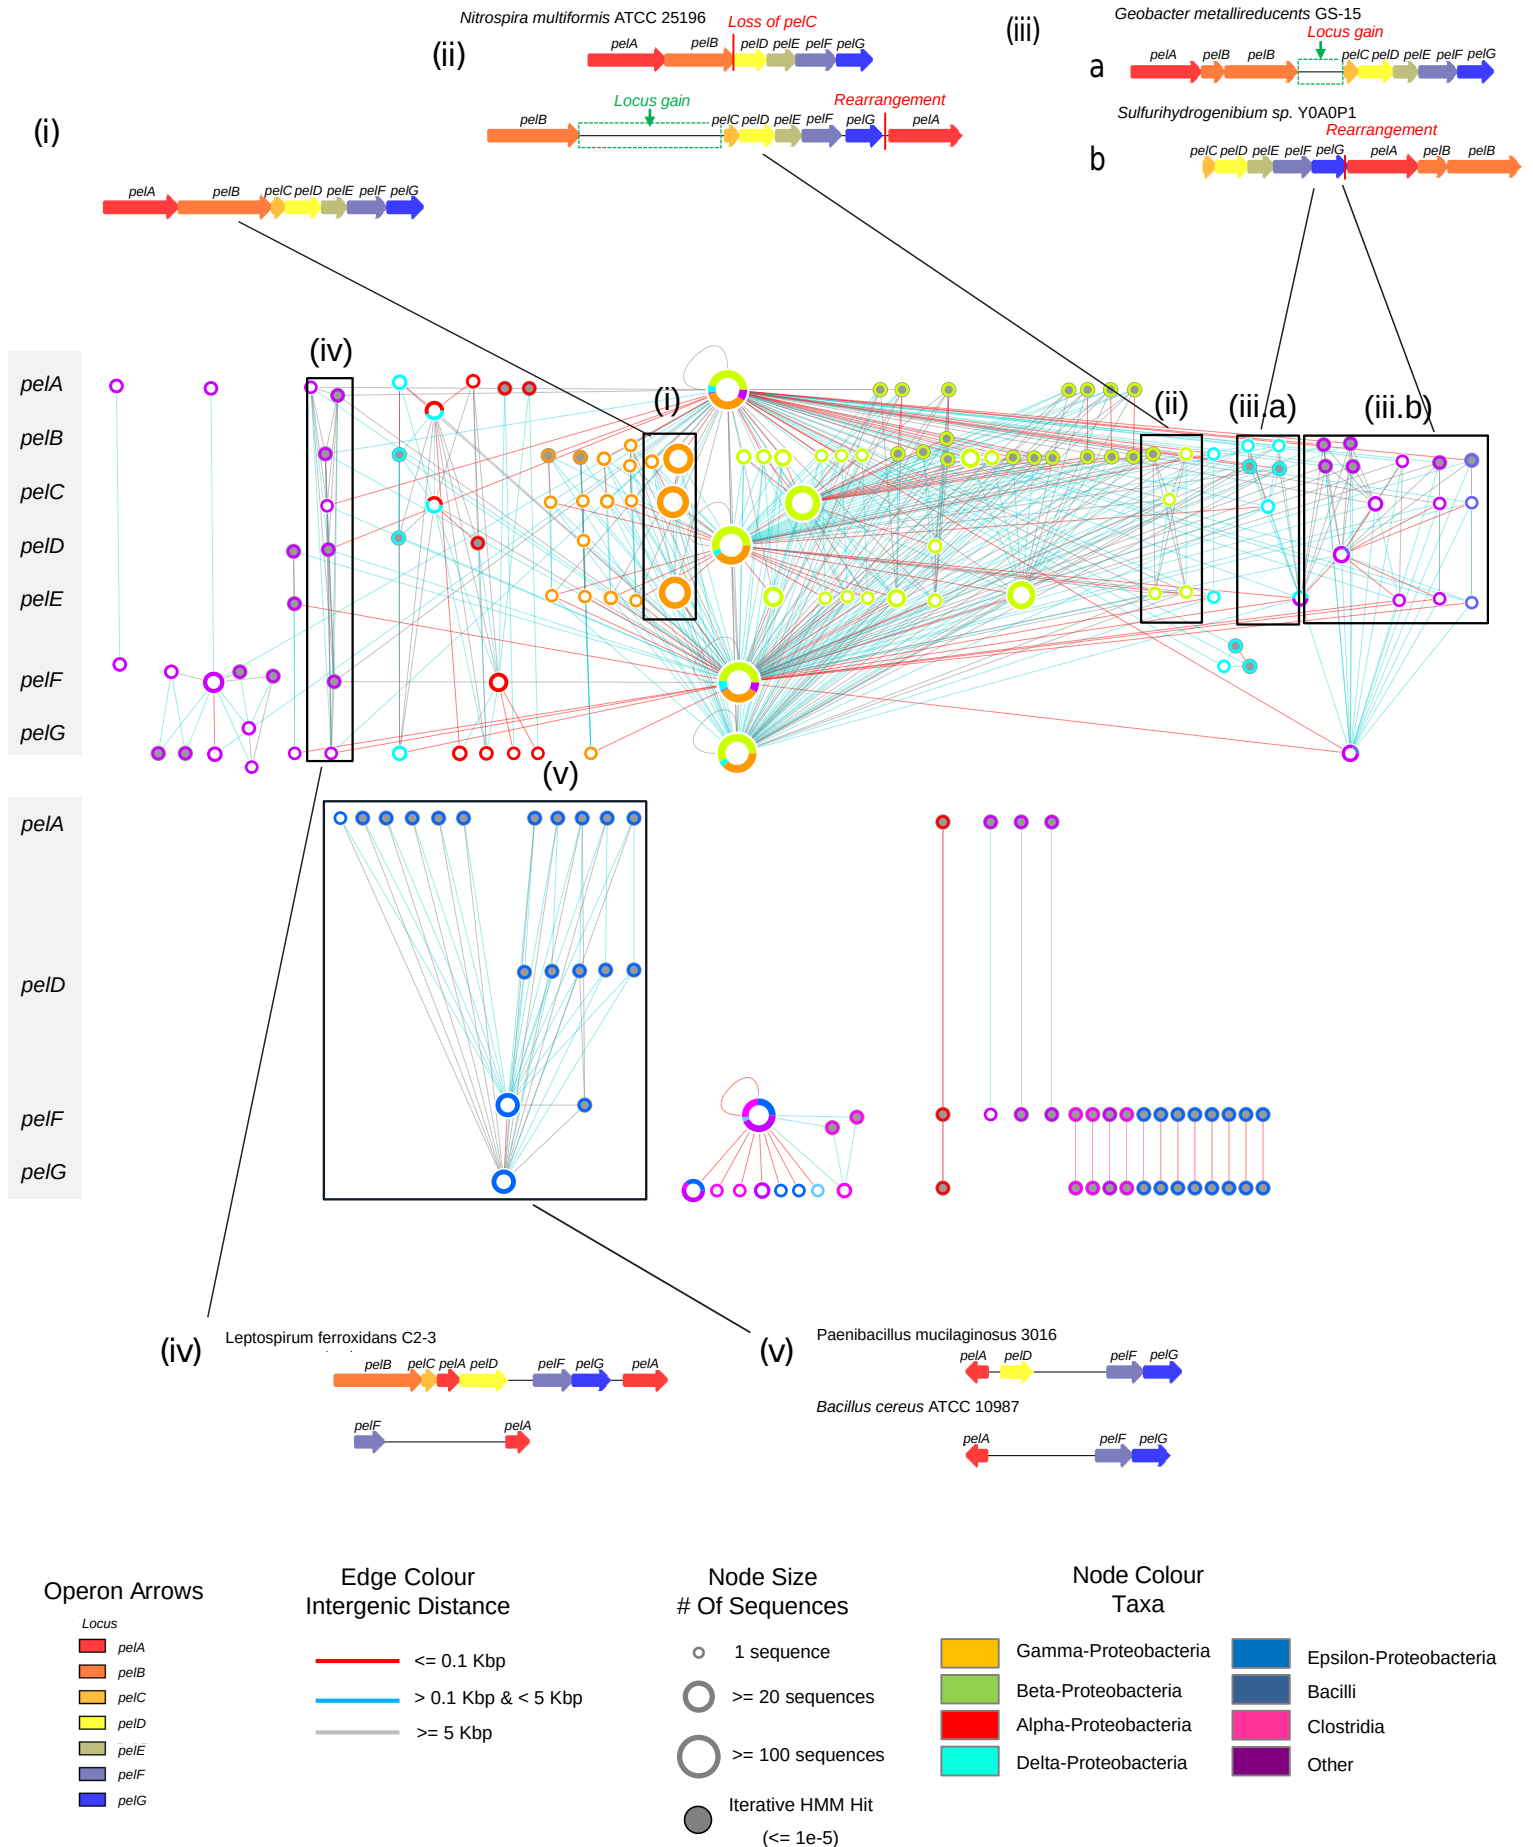

Source: https://www.biorxiv.org/content/10.1101/769745v1.full.pdf
